1 Oscillatory population-level activity of dorsal raphe serotonergic neurons sculpts sleep  
2 structure

3

4 **Abbreviated title:**

5 Serotonin neurons and sleep

6

7 Tomonobu Kato<sup>1</sup>, Yasue Mitsukura<sup>2</sup>, Keitaro Yoshida<sup>1</sup>, Masaru Mimura<sup>1</sup>, Norio  
8 Takata<sup>1</sup>, Kenji F. Tanaka<sup>1,3</sup>

9

10 <sup>1</sup>Department of Neuropsychiatry, Keio University School of Medicine, 35  
11 Shinanomachi, Shinjuku-ku, Tokyo 160–8582, Japan.

12 <sup>2</sup>Department of System Design Engineering, Faculty of Science and Technology of  
13 Keio University, 3-14-1 Hiyoshi, Kohoku-ku, Yokohama, Kanagawa 223–8522, Japan.

14 <sup>3</sup>Division of Brain Sciences, Institute for Advanced Medical Research, Keio University  
15 School of Medicine, 35 Shinanomachi, Shinjuku-ku, Tokyo 160–8582, Japan.

16

17 **Corresponding author:**

18 Kenji F. Tanaka, MD, Ph.D.

19 Division of Brain Sciences, Institute for Advanced Medical Research, Keio University  
20 School of Medicine, Tokyo, 160–8582, Japan.

21 Tel: +81-3-5363-3934

22 E-mail address: [kftanaka@keio.jp](mailto:kftanaka@keio.jp)

23

24

25 **Number of pages: 39**

26 **Number of figures: 5 main, 1 extended**

27 **Number of words for abstract: 250**

28 **Number of words for introduction: 442**

29 **Number of words for discussion: 1182**

30

31 **Conflict of interest statement:**

32 The authors declare no competing interests.

33

34 **Acknowledgments:**

35 This work was supported by Grant-in-Aid for Transformative Research Areas (A)

36 (20H05894) from MEXT to KFT, Grant-in-Aid for Brain Mapping by Integrated

37 Neurotechnologies for Disease Studies (Brain/MINDS) (JP21dm0207069) from AMED

38 to KFT, Grant-in-Aid for Scientific Research on Innovative Areas (Research in a

39 proposed research area) (21H00212) from JSPS to NT, Grant-in-Aid for Scientific

40 Research (C) (19K06944) from JSPS to NT.

41

42

43 **Abstract**

44

45 Dorsal raphe (DR) 5-HT neurons are involved in regulating sleep-wake transitions.  
46 Previous studies demonstrated that single-unit activity of DR 5-HT neurons is high  
47 during wakefulness, decreases during non-rapid eye movement (NREM) sleep, and  
48 ceases during rapid eye movement (REM) sleep. However, characteristics of the  
49 population-level activity of DR 5-HT neurons, which can influence the entire brain, are  
50 largely unknown. Here we measured population activities of 5-HT neurons in male and  
51 female mouse DR across the sleep-wake cycle by a ratiometric fiber photometry system.  
52 We found a slow oscillatory activity of compound intracellular  $\text{Ca}^{2+}$  signals during  
53 NREM sleep. The trough of concave 5-HT activity increased along with sleep  
54 progression, but the 5-HT activity level always returned to that seen in wake periods.  
55 When the trough reached the minimum level and remained there, REM sleep initiated.  
56 We also found a unique coupling of the oscillatory 5-HT activity and EEG power  
57 fluctuation, suggesting that EEG fluctuation is a proxy for 5-HT activity. Optogenetic  
58 activation of 5-HT neurons during NREM sleep triggered a high EMG power and  
59 induced wakefulness. Optogenetic inhibition induced REM sleep or sustained NREM  
60 with an EEG power increase and EEG fluctuation. These manipulations demonstrated a  
61 causal role of DR 5-HT neurons in sculpting sleep-wake structure. We also observed  
62 EEG fluctuations in human males during NREM sleep, implicating the existence of 5-  
63 HT oscillatory activity in humans. We propose that NREM sleep is not a monotonous  
64 state, but that it is dynamically regulated by the oscillatory population activity of DR 5-  
65 HT neurons.

66

67 **Significant statement**

68

69 Previous studies have demonstrated single-cell 5-HT neuronal activity across sleep-  
70 wake conditions; however, population-level activities of these neurons are largely  
71 unknown. We monitored dorsal raphe (DR) 5-HT population activity using a fiber  
72 photometry system in mice and demonstrated that activity was highest during  
73 wakefulness, and lowest during rapid eye movement (REM) sleep. Surprisingly, during  
74 non-REM (NREM) sleep, the 5-HT population activity decreased with an oscillatory  
75 pattern, coinciding with EEG fluctuations. We examined the causal role of these 5-HT  
76 neuron activities by optogenetics and found that DR 5-HT neurons sculpted sleep-wake  
77 conditions by influencing EEG and EMG patterns. We found similar EEG fluctuations  
78 in a human sleep EEG study, suggesting the presence of oscillatory 5-HT neuron  
79 activity during NREM across species.

80

81 **Introduction**

82

83 The dorsal raphe (DR) nucleus in the hindbrain contains about one third of the brain's  
84 5-HT neurons (Müller et al., 2010). DR 5-HT neurons mainly innervate the forebrain,  
85 including the cortex and the striatum (Gaspar and Lillesaar, 2012). The roles of DR 5-  
86 HT neurons vary from regulating physical activities to regulating emotional states  
87 (Müller et al., 2010).

88 In regards to sleep-wake regulation by DR 5-HT neurons, studies employing  
89 DR 5-HT neuron ablation or other methods that induce a loss-of-function of these  
90 neurons demonstrated disturbances in sleep-wake structure. DR ablation reduced sleep

91 in cats (Jouvet, 1968) and fish (Oikonomou et al., 2019). Administration of the  
92 irreversible inhibitor of tryptophan hydroxylase (Tph; the rate-limiting enzyme in 5-HT  
93 synthesis) reduced sleep in monkeys (Weitzman et al, 1968), cats (Koella et al, 1968),  
94 rats (Mouret et al.,1968; Torda, 1967), and fish (Oikonomou et al., 2019). Knockout of  
95 *Tph2* (the gene encoding the central nervous system isoform of Tph) reduced sleep  
96 (Siesta) in mice (Whitney et al., 2016) and fish (Oikonomou et al., 2019). All these  
97 long-term loss-of-function manipulations of the DR 5-HT neurons resulted in decreased  
98 sleep. In contrast, temporary cooling of the DR *induced* sleep in cats (Raymond et al.,  
99 1976), indicating an opposing outcome after acute loss-of-function of DR 5-HT neurons.  
100 Although the outcome of loss-of-function studies targeting DR 5-HT neurons are  
101 controversial, it is widely accepted that DR 5-HT neurons are causally involved in the  
102 sleep-wake structure.

103           Unlike the interventional studies modulating DR 5-HT neuronal activity,  
104 observational electrophysiological studies monitoring DR neuronal activities have  
105 reported consistent results (McGinty & Harper, 1976; Lacher, 1985; Urbain et al., 2006;  
106 Sakai, 2011). Single-unit recording from the DR across the sleep-wake cycle revealed  
107 two major types of neurons. One type—the 5-HT neuron cell type—tonically fires  
108 during wakefulness, is less active during non-rapid eye movement (NREM) sleep, and  
109 is mostly silent during rapid eye movement (REM) sleep. The other cell type—non-5-  
110 HT neurons, such as dopaminergic or GABAergic neurons —does not modulate its  
111 firing rate across the sleep-wake cycle (Sakai, 2011). These pioneering studies  
112 encouraged us to monitor the population-level activity of DR 5-HT neurons across the  
113 sleep-wake cycle because the population 5-HT neuron activity, rather than individual  
114 neuron activity, could mediate a wide range of cortical activity patterns.

115           In this study, we sought to examine the dynamics of the population activity of  
116 DR 5-HT neurons during sleep in mice and to address how such dynamics were  
117 correlated to EEG and EMG changes. We addressed the causal relationship between DR  
118 5-HT neuron activity and EEG/EMG changes across sleep stages using optogenetics.  
119 We further attempted to find similar EEG fluctuations in humans during NREM sleep.

120

## 121 **Materials and Methods**

122

### 123 *Ethics statement*

124

125 All animal procedures were conducted in accordance with the National Institutes of  
126 Health *Guide for the Care and Use of Laboratory Animals* and approved by the Keio  
127 University Animal Experiment Committee in compliance with the Keio University  
128 Institutional Animal Care and Use Committee (approval numbers: 12035 and 14027).  
129 Human experiments were approved by the Keio University Faculty of Science and  
130 Technology Bioethics Committee (approval ID: 31-7). This study was conducted  
131 following the principles of the Declaration of Helsinki. Informed consent was obtained  
132 from all participants.

133

### 134 *Animals*

135

136 Experiments were conducted with 8-14-month-old male and female mice. All mice  
137 were maintained on a 12:12 h light/dark cycle (lights on at 08:00), and  
138 polysomnographic recordings were performed during the light phase. Tph2-yellow

139    cameleon (YC) mice (*Tph2*-tTA::tetO-YC-nano50 double transgenic mice) were  
140    obtained by crossing tetO-YC-nano50 mice and *Tph2*-tTA mice (Miyazaki et al., 2014)  
141    and tetO-YC-nano50 mice (Kanemaru et al., 2014). *Tph2*-Chr2 mice (*Tph2*-tTA::tetO-  
142    Chr2(C128S)-EYFP double transgenic mice) were obtained by crossing *Tph2*-tTA  
143    mice and tetO-ChR2 mice (Tanaka et al., 2012). *Tph2*-Archaeorhodopsin T (ArchT)  
144    mice (*Tph2*-tTA::tetO-ArchT-EGFP double transgenic mice) were obtained by crossing  
145    *Tph2*-tTA mice and tetO-ArchT-EGFP mice (Tsunematsu et al., 2013). All mouse lines  
146    were sourced from the RIKEN BioResource Center. The genetic background of all  
147    transgenic mice was mixed with C57BL6 and 129 SvEvTac. Genotyping for *Tph2*-tTA,  
148    tetO-YC-nano50, tetO-ChR2(C128S), and tetO-ArchT has been previously described  
149    (Tanaka et al., 2012; Tsunematsu et al., 2013; Miyazaki et al., 2014; Kenamaru et al.,  
150    2014).

151

### 152    ***Surgical procedure***

153

154    Surgeries were performed using a stereotaxic apparatus (SM-6M-HT, Narishige). Mice  
155    were anesthetized with a mixture of ketamine and xylazine (100 mg/kg and 10 mg/kg,  
156    respectively). Body temperature during surgery was maintained at  $37 \pm 0.5$  °C using  
157    a heating pad (FHC-MO, Muromachi Kikai). An optic fiber for optogenetics or  
158    photometry was inserted into the DR at the following coordinates relative to bregma:  
159    AP,  $-4.3$  mm; ML,  $0.0$  mm; and DV,  $3.0$  mm, all while tilted at  $10^\circ$  relative to the  
160    vertical axis (SM-15R, Narishige). The mice received permanent EEG and EMG  
161    electrode implants for polysomnography. Using a carbide cutter (drill size diameter:  
162    0.8 mm), three pits were drilled into the skull, while avoiding penetration of the skull to

163 prevent brain damage. Each implant had a 1.0-mm diameter stainless steel screw that  
164 served as an EEG electrode—one implant was placed over the right frontal cortical area  
165 (AP: +1.0 mm; ML: +1.5 mm) as a reference electrode and the other over the right  
166 parietal area (AP: +1 mm anterior to lambda; ML: +1.5 mm) as a signal electrode.  
167 Another electrode was placed over the right cerebellar cortex (AP: -1.0 mm posterior to  
168 lambda; ML: +1.5 mm) as a ground electrode. Two silver wires (AS633; Cooner Wire  
169 Company, USA) were placed bilaterally into the trapezius muscles and served as EMG  
170 electrodes. Finally, the electrode assembly and optical fiber cannula were anchored and  
171 fixed to the skull with Super-Bond (Sun Medical Co., Shiga, Japan).

172

### 173 ***EEG/EMG recordings***

174

175 The EEG/EMG signals were amplified (gain  $\times 1000$ ) and filtered (EEG: 1-100  $\square$  Hz,  
176 EMG: 10-100  $\square$  Hz) using a DC/AC differential amplifier (AM-3000, AM systems). The  
177 input was then received via an input module (NI-9215, National Instruments), digitized  
178 at a sampling rate of 1000 Hz by a data acquisition module (cDAQ-9174, National  
179 Instruments), and recorded by a custom-made LabVIEW program (National  
180 Instruments). We habituated the mice sufficiently, in other ward, REM sleep (see  
181 Vigilance State Assessment) was often observed, then started measurements.  
182 Measurements were performed on 5 mice at 1-4 h/session, 1-2 sessions/mice (total 7  
183 sessions).

184

### 185 ***Mice Vigilance state assessment***

186



187 EEG/EMG signals were analyzed using MATLAB (MathWorks, MA, USA). The  
188 power spectral data of the EEG were obtained using the multispectrogram method. A  
189 power spectral profile over a 1-50 Hz window was used for the analysis. We detected  
190 each sleep-wake state scored offline by characterizing 1-s epochs, as described in a  
191 previous study(Funato et al., 2016). A wake state was characterized by low-amplitude  
192 fast EEG and high-amplitude variable EMG. NREM sleep was characterized by high-  
193 amplitude delta (1-4 Hz) frequency EEG and a low-amplitude tonus EMG. REM sleep  
194 was staged based on theta (6-9 Hz)-dominant EEG and EMG atonia.

195

#### 196 *Fiber photometry*

197

198 The method for ratiometric fiber photometry has been described previously (Natsubori  
199 et al., 2017). An excitation light (435 nm; silver light-emitting diode, Prizmatix) was  
200 reflected off a dichroic mirror (DM455CFP, Olympus), focused with a 2× objective lens  
201 (numerical aperture 0.39, Olympus) and coupled into an optical fiber (M79L01, Φ  
202 400 μm, 0.39 numerical aperture; Thorlabs) through a pinhole (Φ 400 μm). The light-  
203 emitting diode power was <200 μW at the fiber tip. The cyan and yellow fluorescence  
204 emitted by YC-nano50 was collected via an optical fiber cannula, divided by a dichroic  
205 mirror (DM515YFP, Olympus) into cyan (483/32 nm band path filters, Semrock) and  
206 yellow (542/27 nm), and detected by a photomultiplier tube (H10722-210, Hamamatsu  
207 Photonics). The fluorescence signals were digitized using a data acquisition module  
208 (cDAQ-9174, National Instruments) and simultaneously recorded using a custom-made  
209 LabVIEW program (National Instruments). Signals were collected at a sampling  
210 frequency of 1000 Hz.

211

212 ***Optogenetic manipulation***

213

214 An optical fiber (numerical aperture 0.39, Thorlabs) was inserted through the guide  
215 cannula. Blue (470 nm) and yellow (575 nm) light was generated using a SPECTRA  
216 2-LCR-XA light engine (Lumencor). The blue and yellow light power intensity at the  
217 tip of the optical fiber was 0.5-1 mW and 6-8 mW, respectively. During EEG and  
218 EMG monitoring, we illuminated ChR2-expressing mice during the wake, NREM, and  
219 REM periods. We illuminated Arch-T-expressing mice during the NREM period. For  
220 ChR2 activation, blue and yellow light (1 s and 5 s duration, respectively) were used to  
221 open and close the step-function type opsin ChR2(C128S) (Berndt et al., 2009). In the  
222 control trials, yellow light was used instead of blue light in Tph2-ChR2 mice. For  
223 ArchT activation, a 120-s duration of yellow (inhibition) light was used in Tph2-ArchT  
224 mice. In control trials, yellow light was used in wild-type mice.

225

226 ***Histology***

227

228 Mice were deeply anesthetized with ketamine (100 mg/kg) and xylazine (10 mg/kg)  
229 and perfused with 4% paraformaldehyde phosphate buffer solution. Brains were  
230 removed from the skull and postfixed in the same fixative overnight. Subsequently, the  
231 brains were cryoprotected in 20% sucrose overnight, frozen, and cut at a 25- $\mu$ m  
232 thickness on a cryostat. Sections were mounted on silane-coated glass slides  
233 (Matsunami Glass). The sections were incubated overnight with anti-GFP antibodies  
234 (1:200, goat polyclonal, Rockland) at room temperature and then incubated with anti-

235 goat IgG antibody conjugated to Alexa Fluor 488 (1:1000, Invitrogen) for 2 h at room  
236 temperature. Fluorescence images were obtained using an all-in-one microscope (BZ-  
237 X710, Keyence).

238

### 239 ***Human subjects and polysomnography***

240

241 We included 9 healthy male participants (aged 20-29 years [mean  $\pm$  SD = 23.6  $\pm$  0.22]).  
242 The exclusion criteria were (a) a history of neurological or psychiatric diseases and (b)  
243 alcohol or drug abuse. A total of 10 recording electrodes were prepared, including 4  
244 EEG channels (C3A2, C4A1, O1A2, O2A1), 2 EOG channels (LOCA1, LOCA3), and 3  
245 EMG channels (chin, both knees). All recordings were sampled at a rate of 200 Hz.  
246 EEG recording were made using Ag/AgCl electrodes. Data were acquired with  
247 polysomnography equipment (Philips Healthcare, Alice PDx), and the sleep stages were  
248 judged by the American Academy of Sleep Medicine scoring rules.

249

### 250 ***Data processing and analysis***

251

252 All animals and trials were randomly assigned to an experimental condition.  
253 Experimenters were not blinded to the experimental conditions during data collection  
254 and analysis. Mice were excluded when the optical fiber position was not correctly  
255 targeted. Fiber photometry data were analyzed using custom-made programs in  
256 MATLAB. Yellow and cyan fluorescence were fitted using a binary exponential  
257 function to counteract the fading of fluorescent proteins and the fading of  
258 autofluorescence of optical fibers. We then used the YC ratio ( $R$ ), which is the ratio of

259 yellow to cyan fluorescence intensity, for calculating neural activity. We derived the  
260 value of the photometry signal ( $\Delta R/R_0$ ) by calculating  $(R - R_0) / R_0$ , where  $R_0$  was  
261 the baseline fluorescence signal (signals in the wake state). For normalization of activity  
262 intensity, population 5-HT activities during the wake period were regarded as 0, and the  
263 REM period was regarded as -1. We defined the baseline at -0.1 to omit small  
264 fluctuations and/or baseline trends. We defined the single concave wave as the event  
265 that had a trough below -0.5. For normalization of the length of each epoch (one  
266 session of each sleep state), we normalized the length at 1000 (a.u.). Then, we  
267 calculated the maximum and minimum 5-HT activities for every 100 (a.u.). Data for all  
268 experiments were analyzed using parametric statistics: Student's  $t$  test (Independent-  
269 samples  $t$ -test), paired  $t$  test, and one-way ANOVA followed by the Tukey-Kramer post  
270 hoc test, as well as repeated measures ANOVA. For mouse EEG, we set each EEG  
271 frequency band as follows: delta: 1-4 Hz; theta: 6-9 Hz; alpha; 9-12 Hz; and beta: 12-30  
272 Hz (Choi et al., 2010). In humans, we set it as follows: delta: 1-3 Hz; theta: 4-7 Hz;  
273 alpha: 8-13 Hz; and beta: 15-28 Hz (Başar et al., 2013).

274

### 275 ***Data availability***

276

277 The datasets generated during and/or analyzed in the current study are available from  
278 the corresponding author on reasonable request.

279

## 280 **Results**

281

### 282 ***Dorsal raphe 5-HT neurons showed oscillatory population-level activity during***

283 ***NREM sleep***

284

285 To investigate population activity of 5-HT neurons in the DR during the sleep-wake  
286 cycle, we used a fiber photometry system and monitored intracellular calcium signals  
287 from 5-HT neurons in the DR of freely moving mice (**Fig. 1a**). We used transgenic mice  
288 expressing a FRET-based ratiometric  $\text{Ca}^{2+}$  indicator, YC-nano50 (Horikawa et al.,  
289 2010), in 5-HT neurons under the control of the *Tph2* promoter (Tph2-YC mice; **Fig. 1b**,  
290 **c**). The ratio of yellow to cyan fluorescence intensities (YC ratio) represents a  
291 compound  $\text{Ca}^{2+}$  activity of 5-HT neurons. Since fluorescence intensities of these two  
292 colors exhibit inversely proportional dynamics according to changes in  $\text{Ca}^{2+}$   
293 concentration, the YC ratio is suited for detecting a decrease as well as an increase in  
294  $\text{Ca}^{2+}$  concentration (Tsutsui-Kimura et al., 2017; Yoshida et al., 2019).

295 We observed changes in the population activity of DR 5-HT neurons across the  
296 sleep-wake cycle (**Fig. 1d** bottom). Sleep-wake stages were identified with EEG and  
297 EMG measurements (**Fig. 1d**). During wake periods (green bars in the hypnogram; **Fig.**  
298 **1d**), population activity of the DR 5-HT neurons showed small amplitude fluctuations.  
299 During NREM sleep (dark blue bars), the average population activity was lower than  
300 that during the wake period. During REM sleep (red bars), population activity of the DR  
301 5-HT neurons was at a minimum (**Fig. 1e**; normalized 5-HT activities of 7 sessions  
302 from 5 mice, 1-4 h per sessions for total 17 h; mean 5-HT activities during wake and  
303 REM states were normalized to 0 and -1, respectively). These observations were  
304 consistent with previous findings obtained through electrophysiological studies  
305 examining single neuron activity (Jacobs et al., 1992).

306 We found oscillatory population activity of DR 5-HT neurons during NREM

307 sleep, regardless of the type of NREM epoch: one type of epoch was NREM flanked by  
308 wake periods (NREM<sup>→Wake</sup>; **Fig. 1f**) and the other was NREM flanked by a wake period  
309 on one side and a REM period on the other (NREM<sup>→REM</sup>; **Fig. 1g**). Hereafter we defined  
310 both NREM epochs as a period including more than three concaves (downward Ca<sup>2+</sup>  
311 waves) with a greater than -0.5 trough. Using these criteria, the duration of NREM<sup>→Wake</sup>  
312 and NREM<sup>→REM</sup> epochs was similar (**Fig. 1i**; mean ± SD: 196 ± 108 s and 177 ± 113 s,  
313 respectively; n = 29 and 38 epochs, respectively, from 5 animals). A small concave  
314 wave of 5-HT activity appeared during the first half to one-third of either NREM<sup>→Wake</sup>  
315 or NREM<sup>→REM</sup> epochs (**Fig. 1f, g**). The trough of the concave wave gradually declined  
316 during a NREM period (**Fig. 1h**). The 5-HT population activity of each concave wave  
317 returned from the trough to its baseline, which was similar to the activity level during a  
318 wake period. We then defined the concave 5-HT activity wave as the event that had a  
319 trough level below -0.5. There was no difference in the number of concave waves  
320 during an epoch of NREM<sup>→Wake</sup> or NREM<sup>→REM</sup> (mean ± SD: 6.0 ± 2.6 and 6.0 ± 3.2,  
321 respectively; **Fig. 1j**). Activity of 5-HT neurons of the last concave wave during NREM  
322 sleep (NREM<sup>→REM</sup>) did not return to its baseline, but decreased further to a lower level  
323 of a 5-HT activity, and then NREM switched to REM sleep. The mean trough level of  
324 the last concave wave during a NREM<sup>→REM</sup> epoch (purple area in **Fig. 1f**) was slightly  
325 lower than that of a NREM<sup>→Wake</sup> epoch (cyan area in **Fig. 1g**) (mean ± SD: -0.9 ± 0.2  
326 vs -1.0 ± 0.2, *p* = 0.01, independent *t* test. **Fig. 1k**). There was no significant  
327 difference between the duration of the last concave wave in a NREM<sup>→Wake</sup> epoch versus  
328 a NREM<sup>→REM</sup> epoch (mean ± SD: 32 ± 21 and 39 ± 25 s, respectively; *p* = 0.2,

329 independent  $t$  test **Fig. 1l**). Together, the lower trough level of the last concave activity,  
330 rather than the duration of an NREM epoch, the number of concave waves in NREM, or  
331 the duration of the last concave wave, was associated with a transition from NREM to  
332 REM.

333

334 *Low DR 5-HT neuron population activity was accompanied by an increase in*  
335 *wideband EEG power*

336

337 Lowered 5-HT neuron activity may result in altered cortical EEG signals because DR 5-  
338 HT neurons innervate most cortical regions (Gaspar and Lillesaar, 2012). We noticed  
339 vertical stripes in the heatmap of the EEG spectrogram during NREM sleep (**Fig. 2a** top  
340 panel; see also **Fig. 1d** second panel), and thus we asked whether cortical EEG  
341 fluctuation was associated with the oscillatory 5-HT activity during NREM sleep. To  
342 study these repeated EEG activities, we normalized EEG power at frequencies from 10-  
343 50 Hz at frequency intervals of 1 Hz (**Fig. 2a** second panel). The time course of total  
344 EEG power from 10-50 Hz exemplified the periodic increase and decrease in the  
345 wideband EEG power during NREM sleep (**Fig. 2a** third panel) and showed a roughly  
346 inverse correlation to 5-HT activity (**Fig. 2a** bottom panel).

347 We classified 5-HT activity during the NREM period into two categories: 1)  
348 basal activity when normalized 5-HT activity was at  $-0.1$  or above (gray area in **Fig. 2a**  
349 (bottom) and **2b** (left)) a low activity state when the normalized 5-HT activity was less  
350 than  $-0.1$  (red area in **Fig. 2a** (bottom) and **2b** (left)). We found a correspondence  
351 between the lowered activity of 5-HT neurons and a increase in the wideband EEG  
352 power (red area of EEG and 5-HT activities in **Fig. 2a**). To quantify the relationship, we

353 extracted the normalized EEG power from the last 4 s of the basal period of 5-HT  
354 activity or from the 4 s before the trough of 5-HT activity, and compared the two EEG  
355 powers (**Fig. 2b**;  $n = 5$  mice, 7 sessions, total 385 pairs). The EEG power during NREM  
356 at the point of low 5-HT activity was significantly larger than EEG power during basal  
357 5-HT activity (**Fig. 2b**), confirming the augmentation of the EEG power during NREM  
358 with a lowered activity of 5-HT neurons. We found a weak, but significant, negative  
359 correlation between the trough level of the concave 5-HT activity and the magnitude of  
360 the EEG power across frequencies from 10-50 Hz ( $R = -0.13$ ,  $p = 9.2 \times 10^{-3}$ ,  $df = 768$ ,  
361  $n = 7$  sessions from 5 mice, total 385 points). Next, we calculated a cross-correlation  
362 between the EEG power and the 5-HT activity during NREM sleep to investigate the  
363 temporal relationship between these parameters. The cross-correlation had a negative  
364 peak of  $-0.8 \pm 0.1$ , with a lag of  $-0.3 \pm 2.0 \times 10^{-2}$  s and a full-width at half maximum of  
365  $59 \pm 23$  s (**Fig. 2c**;  $n = 5$  mice 7 sessions). The lag was negligible because the time  
366 resolution of YC-nano50 for measurement of 5-HT activity was second. In summary,  
367 we found a transient and repetitive wideband EEG power increase that was associated  
368 with lowered 5-HT activity during NREM sleep.

369

### 370 *Activation of the 5-HT neurons induced wakefulness*

371

372 In addition to the discovery of transient and repetitive increases in EEG power, we  
373 found occasional EMG amplitude increases during NREM sleep. It is well recognized  
374 that EMG amplitude increases appear at the transition from sleep to wake (**Fig. 1d**)  
375 (Funato et al., 2016). Indeed, we found an increase in population DR 5-HT neuron  
376 activity at the transition from sleep (both NREM and REM) to wake (**Fig. 1d**).



377 Therefore, it is possible that the increase in EMG amplitude during NREM sleep is  
378 associated with an increase in 5-HT neuron activity. We aligned the 5-HT neuron  
379 activity and EEG power during an NREM state and found that 5-HT neuron activity  
380 was elevated concurrently with an EMG power increase (**Fig. 3a**). Cross-correlation  
381 analysis between myoelectricity and the population 5-HT neuron activity demonstrated  
382 that the time when 5-HT neuron activity returned to the wake level preceded the  
383 appearance of myoelectric activity by 0.6 seconds (**Fig. 3b**), suggesting that DR 5-HT  
384 neuron activity induced an EMG amplitude increase during NREM sleep.

385 To determine the causal relationship between DR 5-HT neuron activity and  
386 the EMG amplitude increase during NREM sleep, we used transgenic mice in which  
387 only 5-HT neurons express the step-function type variant of ChR2 (Tph2-ChR2(C128S)  
388 (Miyazaki et al., 2014) (**Fig. 3c**) and artificially activated their DR 5-HT neurons for  
389 10 s during NREM sleep. Mice received 1 s of blue light illumination to open ChR2,  
390 followed by 5 s of yellow light illumination to close ChR2, 10 s after the blue light  
391 illumination (**Fig. 3c** middle). Optogenetic activation immediately increased the EMG  
392 amplitude (**Fig. 3d, 3f**;  $n = 4$  mice, wake: 15 sessions, NREM: 38 sessions, REM: 10  
393 sessions) and decreased the delta power of the EEG (**Fig. 3d, 3g**), indicating a transition  
394 to the wake state. The induced wake state persisted after optogenetic activation, lasting  
395  $58 \pm 49$  s (mean  $\pm$  SD,  $n = 42$  sessions). This duration was the same as that of the wake  
396 period seen in control conditions during the light phase of the circadian cycle (**Fig. 3-**  
397 **1a**). In addition, the artificial activation of DR 5-HT neurons during REM sleep induced  
398 wakefulness (**Fig. 3e, 3f**). However, application of the control yellow light (**Fig. 3c**) to  
399 Tph2-ChR2(C128S) mice during their natural sleep state did not induce EEG or EMG  
400 changes (**Fig. 3f, 3g**;  $n = 4$  mice, NREM: 33 sessions, REM: 6 sessions). Blue light

401 illumination to wild-type mice did not induce the EEG or EMG changes during sleep  
402 (**Fig. 3-1c**; n = 3 mice, wake: 13 sessions, NREM: 22 sessions, REM: 17 sessions).  
403 Artificial activation of DR 5-HT neurons during the wake state did not change EEG or  
404 EMG amplitude (**Fig. 3f, Fig. 3-1b**). Collectively, these data indicated that the  
405 myoelectric activity seen in NREM sleep was triggered by the rise to a peak level of DR  
406 5-HT neuron activity. In addition, artificial activation of DR 5-HT neurons was  
407 sufficient to switch from a sleep to a wake state.

408

#### 409 *Inhibition of 5-HT neurons occasionally induced REM*

410

411 At the transition from NREM to REM sleep, the oscillation of DR 5-HT neuron activity  
412 terminated and the lowered DR 5-HT neuron activity in NREM was shifted to that in  
413 REM sleep. We sought to determine whether a continuous inhibition of DR 5-HT  
414 neuron activity induced REM sleep. For this inhibition, we used transgenic mice (Tph2-  
415 ArchT mice) harboring an inhibitory opsin, ArchT, in 5-HT neurons (**Fig. 4a**). In order  
416 to choose the duration of illumination, we measured the latency from the starting  
417 timepoint of the last concave wave during a NREM<sup>→REM</sup> epoch to the trough timepoint  
418 of the following REM (**Fig. 4b**) and found that it ranged from 22-94 s (mean ± SD: 48 ±  
419 21 s, n = 32 transitions; **Fig. 4c**). We thus chose 120 s as the illumination duration, to  
420 allow for a margin of error.

421 We applied optogenetic inhibition during a 3-h polysomnography recording  
422 during the light phase of the circadian cycle. We identified NREM sleep on-line and  
423 initiated 120 s of illumination at the first trial. We had an interval of at least 20 min  
424 before the next trial. As a result, we applied illumination 10 times on average during

425 two recording sessions from each animal. In Tph2-ArchT mice (n = 7), out of 81 trials,  
426 12 trials induced REM sleep (15%) (**Fig. 4d**). In controls (n=4), out of 40 trials, 1 trial  
427 induced REM sleep (2.5%) (**Fig. 4e**). In comparing these two stimulation conditions, we  
428 found that there is a higher probability of REM sleep induction by optogenetic  
429 inhibition versus control light stimulation ( $p = 0.04$ , Fisher's exact test). Nonetheless,  
430 the REM sleep induction rate was low, and NREM sleep was sustained in most trials  
431 (79% vs 88%; Tph2-ArchT mice vs wild type mice). Of note, optogenetic inhibition  
432 after the third session did not increase the REM induction probability.

433         As we previously showed, oscillatory population DR 5-HT neuron activity  
434 corresponds to periodic EEG power fluctuations. Thus, we asked whether EEG power  
435 fluctuations could be perturbed by 120 s of optogenetic inhibition, a duration that  
436 should contain 3-4 concave waves of DR 5-HT neuron activity. Despite mice remaining  
437 in NREM sleep under illumination, we still found EEG power fluctuations (**Fig. 4f**),  
438 indicating two possibilities. The first is that our optogenetic inhibition was not enough  
439 to fully ablate the rise of DR 5-HT neuron activity during NREM. The other possibility  
440 is that oscillatory 5-HT neuron activity does not underlie EEG power fluctuation.  
441 Artificial DR 5-HT silencing did not delete EEG fluctuation during NREM, however,  
442 we have always found a wideband EEG power increase during illumination (**Fig. 4f, 4g**),  
443 supporting the idea that DR 5-HT neuron inhibition during NREM is rather associated  
444 with an EEG power increase.

445

446 *The human brain also showed a transient and repetitive EEG power increase during*  
447 *NREM sleep*

448

449 It is worth considering if the oscillation of 5-HT neuron activity during NREM sleep  
450 occurs in humans, even though humans have distinct sleep structures from mice.  
451 Namely, mice have monophasic sleep patterns, while humans have polyphasic ones. To  
452 pursue this question, we hypothesized that an infra-slow (<0.1 Hz) periodic increase of  
453 wideband EEG activity during NREM sleep could be a proxy for 5-HT activity in the  
454 human brain based on our demonstration in the mouse brain of the tight functional  
455 coupling of lowered 5-HT neuron activity and the heightened wideband EEG during  
456 NREM sleep. We obtained healthy human EEG/EMG/EOG data during a sleep-wake  
457 cycle (**Fig. 5a**). We observed a periodic transient increase in EEG power in the human  
458 brain during NREM sleep (**Fig. 5b**). To highlight these repeated convex activities of  
459 EEG, we normalized EEG power at frequencies from 5-30 Hz at frequency intervals of  
460 1 Hz (**Fig. 5c**). Repeated convex EEG activities were evident during N2 of NREM sleep  
461 (black triangles in **Fig. 5c**). Note that in humans, NREM sleep is subdivided into three  
462 stages, N1, N2, and N3 (Carskadon and Dement, 2011).

463 To compare the frequency structure of the convex EEG activities of mice and  
464 humans, we calculated the cross-correlation coefficients between time-course of the  
465 EEG power at each frequency band during NREM sleep (**Fig. 5d**). Cross-correlation  
466 coefficients between EEG and 5-HT activities were also calculated for the mouse brain.  
467 In mice, strong positive cross-correlations were observed between EEG bands at  $\alpha$  vs  $\beta$   
468 ( $0.61 \pm 0.03$ ; mean  $\pm$  SD) and  $\alpha$  vs  $\theta$  ( $0.45 \pm 0.05$ ; 1-2 sessions of 1-4 h recording from  
469 5 mice each). The lowered 5-HT activity showed a strong negative cross-correlation to  
470  $\alpha$  and  $\beta$  bands of EEG (**Fig. 5d**, lower left section in the leftmost panel). These data  
471 demonstrated a relationship between EEG activities at each frequency band during a  
472 transient lowered 5-HT activity in the mouse brain. In humans, we observed strong

473 positive cross-correlations between the same EEG bands at  $\alpha$  vs  $\beta$  (N1:  $0.28 \pm 0.14$ ; N2:  
474  $0.25 \pm 0.19$ ; N3:  $0.25 \pm 0.09$ ) and  $\alpha$  vs  $\theta$  (N1:  $0.30 \pm 0.05$ ; N2:  $0.43 \pm 0.15$ ; N3:  $0.28 \pm$   
475  $0.09$ ) during all stages of NREM sleep, although the strongest cross-correlation  
476 coefficient was found between the  $\delta$  and  $\theta$  bands (N1:  $0.41 \pm 0.13$ ; N2:  $0.51 \pm 0.14$ ; N3:  
477  $0.38 \pm 0.07$ ; **Fig. 5d** upper right; a single 8.5-h recording session of 5 human subjects).  
478 These data imply the possibility of oscillatory population activity of DR 5-HT neurons  
479 in the human brain.  
480

481 **Discussion**

482 The population 5-HT activity was high during wake, intermediate during NREM sleep,  
483 and low during REM sleep in average. We found a slow oscillatory population activity  
484 of 5-HT neurons (~0.03 Hz) during NREM sleep. Oscillatory changes of population 5-  
485 HT activities coincided with dynamics of EEG power fluctuations in an anti-parallel  
486 manner.

487 Other groups have also described population-level 5-HT neuron activities by  
488 fiber photometry during sleep. Monitoring of DR 5-HT neuron activity using GCaMP6  
489 revealed oscillatory patterns during NREM sleep (Oikonomou et al., 2019). The  
490 duration of the waves was similar to our findings, however, the signal did not return to  
491 the level seen in wakefulness periods. This difference may be due to the nature of the  
492 Ca<sup>2+</sup> sensors used: YC is useful for detecting downward Ca<sup>2+</sup> changes, while GCaMP  
493 was developed to efficiently detect spikes in Ca<sup>2+</sup>. Further study is needed to address  
494 this difference in dynamics using a distinct methodology. For example, the GPCR  
495 activation-based (GRAB)<sub>5-HT</sub> sensor, a probe for extracellular 5-HT, would be ideal.  
496 This was recently examined in a study monitoring extracellular 5-HT levels in the basal  
497 forebrain, which revealed similar oscillatory dynamics during NREM sleep (Wan et al.,  
498 2021). Similar to the GCaMP6 study, though the released 5-HT levels fluctuated, the  
499 extracellular 5-HT levels did not return to the levels seen at periods of wakefulness.  
500 With recent developments in GRAB<sub>5-HT</sub> sensor technology, an improved version of it  
501 has been reported, having a similar Ca<sup>2+</sup> detection pattern as that observed with YC  
502 (Japan Neuroscience meeting 2021, symposium); comprehensive results of this new  
503 technology are awaited.

504           In our photometry setup, we believe we captured a sufficient spatial range  
505 across the entire DR and were able to detect YC signals in 5-HT neurons in an unbiased  
506 manner. We used an optic fiber with a 400- $\mu\text{m}$  diameter and a 0.39 numerical aperture.  
507 According to our previous estimation (Natsubori et al., 2017), this system could detect  
508 signals up to 700  $\mu\text{m}$  beneath the tip of fiber. As a result, the shape of the range would  
509 be a conical frustrum, with 200- and 470-  $\mu\text{m}$  radiuses and a 700- $\mu\text{m}$  height, suggesting  
510 that we covered most of the DR and did not detect signals from the median raphe (MR).  
511 A recent single-cell RNAseq study in DR/MR 5-HT neurons identified 6 clusters (Ren  
512 et al., 2019). Each cluster was located with some spatial bias in DR, but the range  
513 defined by the conical frustrum would roughly cover all clusters. Further, previous  
514 single-unit recordings from DR 5-HT neurons revealed four types of wake-activating  
515 neurons (that is, sleep-inhibiting neurons) and demonstrated their locations (Sakai,  
516 2011). The location of each type varied, but the detection range of our photometry setup  
517 would cover most of DR neurons recorded. Together, we assume that we monitored  
518 most of DR 5-HT neurons in an unbiased manner in our photometry setup, including all  
519 the major clusters identified by single-cell RNAseq and the major cell types identified  
520 by single-cell recording. In fact, the patterns of DR 5-HT neuron population activities  
521 were indistinguishable between animals, supporting that the same population was  
522 targeted across animals in our study.

523           The population activity of DR 5-HT neurons was lowest during REM sleep.  
524 Does this mean that none of the DR 5-HT neurons fire during REM sleep? We believe  
525 this is not the case, since we did not observe the lowest level when REM sleep first  
526 began (**Fig. 1g, 4b**). It was only after a substantial delay that the population activity  
527 level reached its lowest, and still, it exhibited minor fluctuations afterward. To reconcile

528 this decline at the initial phase of REM sleep, we reanalyzed a previous report (Sakai,  
529 2011), in which the author monitored a total 229 DR 5-HT neuron activities by a single  
530 unit recording and described varied firing patterns during sleep. The author identified  
531 195 wake-activating 5-HT neurons (4-5 Hz firing at wake periods), 9 wake/REM-  
532 activating probable 5-HT neurons (4-5 Hz firing at wake periods), and 25 sleep-  
533 activating probable 5-HT neurons ( $<0.5$  Hz firing at wake periods). The author further  
534 classified wake-activating 5-HT neurons into 4 subtypes. Type I and II cells ( $n=115$ ,  
535 50%) completely ceased to fire at the REM sleep stage and type III and IV cells ( $n=80$ ,  
536 35%) fired at the beginning of REM sleep ( $<1$  Hz) and decreased their firing rates ( $<0.5$   
537 Hz) afterwards. Wake/REM-activating neurons (4%) increased their firing rates from 2  
538 Hz at the initial phase of REM to 4 Hz during REM sleep. Sleep-activating neurons  
539 (11%) fired at 2 Hz in both NREM and REM sleep. Since the population 5-HT neuron  
540 activity level at the beginning of REM sleep was higher than the level at the nadir  
541 during REM sleep, the decrease in firing rate in wake-activating type III and IV cells  
542 was attributable to the decline of population 5-HT neuron activity after the transition to  
543 REM. During REM sleep, wake/REM-activating neurons and sleep-activating neurons  
544 (total 15%) tonically fire at 2-4 Hz and these neuron activities may induce fluctuations  
545 during REM sleep.

546 REM sleep induction by optogenetic inhibition of DR 5-HT neurons is  
547 controversial. We were only able to induce REM sleep at the first and second sessions  
548 of illumination of ArchT. Illumination after the third session failed to induce REM sleep.  
549 These data suggested that silencing of DR 5-HT neurons facilitates the induction of  
550 REM sleep, but the effect of artificial silencing may be canceled adaptively. Although  
551 we induced REM sleep by optogenetic inhibition, the success rate was at most 15%,



552 suggesting that another mechanism was required to induce REM sleep. In the future, it  
553 may worth trying to inhibit the locus coeruleus noradrenergic neurons because they fire  
554 at 1-3 Hz during the wake period, have reduced activity during NREM sleep, and cease  
555 firing during REM sleep (Aston-Jones and Bloom, 1981). Further studies are required to  
556 explore the conditions required to induce REM sleep efficiently.

557           Direct measurement of 5-HT dynamics in the human brain is difficult, though  
558 there are a few studies that have succeeded in detecting 5-HT fluctuations using  
559 invasive methods such as microdialysis or fast-scan cyclic voltammetry (Suominen et  
560 al., 2013; Silberbauer et al., 2019; Bang et al., 2020). Based on data in the present study,  
561 we propose a noninvasive strategy to infer 5-HT dynamics during NREM sleep in the  
562 human brain using EEG measurement: transient and repetitive EEG power surges,  
563 especially during NREM stage 2, may reflect decreased population 5-HT activities. In  
564 support of this idea, a relationship between EEG and 5-HT dynamics has been reported  
565 with pharmacological perturbations. Administration of selective serotonin reuptake  
566 inhibitors to healthy subjects reduced the total power of EEG (Dumont et al., 2005). In  
567 addition, a specific antagonist for serotonin 5-HT<sub>2</sub> receptors prolonged the duration of  
568 slow-wave sleep and enhanced EEG power at delta and theta frequencies (Dijk et al.,  
569 1989).

570           In conclusion, the population activity of DR 5-HT neurons fluctuated during  
571 NREM sleep in mice. The temporal association between population DR 5-HT neuron  
572 activity and wideband EEG power and the outcomes of optogenetic manipulation of DR  
573 5-HT neuron indicate that mouse NREM sleep is not a monotonous but a dynamic state  
574 sculpted by oscillatory population activity of DR 5-HT neurons.

575

576 **References**

577

578 Aston-Jones G, Bloom FE (1981) Activity of norepinephrine-containing locus coeruleus

579 neurons in behaving rats anticipates fluctuations in the sleep-waking cycle. *J Neurosci*

580 1:876–886.

581

582 Bang D, Kishida KT, Lohrenz T, White JP, Laxton AW, Tatter SB, Fleming SM,

583 Montague PR (2020) Sub-second Dopamine and Serotonin Signaling in Human

584 Striatum during Perceptual Decision-Making. *Neuron* 108:999-1010.e6

585

586 Başar E, Başar-Eroglu C, Güntekin B, Yener GG (2013) Brain’s alpha, beta, gamma,

587 delta, and theta oscillations in neuropsychiatric diseases: Proposal for biomarker

588 strategies. *Suppl Clin Neurophysiol* 62:19–54.

589

590 Berndt A, Yizhar O, Gunaydin LA, Hegemann P, Deisseroth K (2009) Bi-stable neural

591 state switches. *Nat Neurosci* 12:229–234.

592

593 Carskadon MA, Dement WC (2011) *Normal Human Sleep: An Overview*. 5<sup>th</sup> ed.

594 *Principles and Practice of Sleep Medicine*. Missouri: Elsevier Saunders:16–26.

595

596 Choi JH, Koch KP, Poppendieck W, Lee M, Shin H-S (2010) High Resolution

597 Electroencephalography in Freely Moving Mice. *J Neurophysiol* 104:1825–1834.

598

599 Christian P. Müller BLJ (2010) Index. In: *Handbook of the Behavioral Neurobiology of*

600 *Serotonin* (Müller CP, Jacobs BL, eds), pp 807–818 *Handbook of Behavioral*

601 *Neuroscience*. Elsevier.

602

603 Dijk DJ, Beersma DGM, Daan S, van den Hoofdakker RH (1989) Effects of seganserin,

604 a 5-HT<sub>2</sub> antagonist, and temazepam on human sleepstages and EEG power spectra.  
605 *Eur J Pharmacol* 171:207–218.

606  
607 Dumont GJH, De Visser SJ, Cohen AF, Van Gerven JMA (2005) Biomarkers for the  
608 effects of selective serotonin reuptake inhibitors (SSRIs) in healthy subjects. *Br J Clin*  
609 *Pharmacol* 59:495–510.

610  
611 Funato H et al. (2016) Forward-genetics analysis of sleep in randomly mutagenized  
612 mice. *Nature* . 2016 Nov 17;539(7629):378-383.

613  
614 Gaspar P, Lillesaar C (2012) Probing the diversity of serotonin neurons. *Philos Trans R*  
615 *Soc B Biol Sci* 367:2382–2394.

616  
617 Horikawa K, Yamada Y, Matsuda T, Kobayashi K, Hashimoto M, Matsu-Ura T,  
618 Miyawaki A, Michikawa T, Mikoshiba K, Nagai T (2010) Spontaneous network  
619 activity visualized by ultrasensitive Ca<sup>2+</sup> indicators, yellow Cameleon-Nano. *Nat*  
620 *Methods* 7:729–732.

621  
622 Jouvet M (1968) Insomnia and decrease of cerebral 5-hydroxytryptamine after  
623 destruction of the raphe system in the cat. *Adv Pharmacol* 6:265–279.

624  
625 Kanemaru K, Sekiya H, Xu M, Satoh K, Kitajima N, Yoshida K, Okubo Y, Sasaki T,  
626 Moritoh S, Hasuwa H, Mimura M, Horikawa K, Matsui K, Nagai T, Iino M, Tanaka KF  
627 (2014) In Vivo visualization of subtle, transient, and local activity of astrocytes using an  
628 ultrasensitive Ca<sup>2+</sup> indicator. *Cell Rep* 8:311–318.

629

- 630 Koella WP, Feldstein A, Czicman JS (1968) The effect of para-chlorophenylalanine of  
631 the sleep of cats.
- 632  
633 Lacher G (1985) Surgical procedures. *Acta Otorhinolaryngol Belg* 39:133.
- 634  
635 McGinty DJ, Harper RM (1976) Dorsal raphe neurons: depression of firing during  
636 sleep in cats. *101:569–575*.
- 637  
638 Miyazaki KW, Miyazaki K, Tanaka KF, Yamanaka A, Takahashi A, Tabuchi S, Doya  
639 K (2014) Optogenetic activation of dorsal raphe serotonin neurons enhances patience  
640 for future rewards. *Curr Biol* 24:2033–2040.
- 641  
642 Mouret J, Bobillier P, Jouvet M (1968) Insomnia following parachlorophenylalanin in  
643 the rat. *Eur J Pharmacol* 5:17–22.
- 644  
645 Natsubori A, Tsustui-kimura I, Nishida H, Bouchekioua Y, Sekiya H (2017)  
646 Ventrolateral striatal medium spiny neurons positively regulate food-incentive , goal-  
647 directed behavior independently of D1 and D2 selectivity.
- 648  
649 Oikonomou G, Altermatt M, Zhang R wei, Coughlin GM, Montz C, Gradinaru V,  
650 Prober DA (2019) The Serotonergic Raphe Promote Sleep in Zebrafish and Mice.  
651 *Neuron* 103:686-701.e8
- 652  
653 Raymond Cespuglio, Elizabeth Walker M-EG and RM (1976) Cooling of The Nucleus  
654 Raphe Dorsalis Induces Sleep In The Cat. *Neurosci Lett* 3:221–227.
- 655  
656 Ren J, Isakova A, Friedmann D, Zeng J, Grutzner SM, Pun A, Zhao GQ, Kolluru SS,  
657 Wang R, Lin R, Li P, Li A, Raymond JL, Luo Q, Luo M, Quake SR, Luo L (2019)

658 Single-cell transcriptomes and whole-brain projections of serotonin neurons in the  
659 mouse dorsal and median raphe nuclei. *Elife* 8:1–36.

660  
661 Sakai K (2011) Sleep-waking discharge profiles of dorsal raphe nucleus neurons in  
662 mice. *Neuroscience* 197:200–224.

663  
664 Silberbauer LR, Gryglewski G, Berroterán-Infante N, Rischka L, Vanicek T, Pichler V,  
665 Hienert M, Kautzky A, Philippe C, Godbersen GM, Vranka C, James GM, Wadsak W,  
666 Mitterhauser M, Hacker M, Kasper S, Hahn A, Lanzenberger R (2019) Serotonin  
667 transporter binding in the human brain after pharmacological challenge measured using  
668 PET and PET/MR. *Front Mol Neurosci* 12:1–11.

669  
670 Suominen T, Uutela P, Ketola RA, Bergquist J, Hillered L, Finel M, Zhang H, Laakso  
671 A, Kostianen R (2013) Determination of Serotonin and Dopamine Metabolites in  
672 Human Brain Microdialysis and Cerebrospinal Fluid Samples by UPLC-MS/MS:  
673 Discovery of Intact Glucuronide and Sulfate Conjugates. *PloS One* 8:2–10.

674  
675 Tanaka KF, Matsui K, Sasaki T, Sano H, Sugio S, Fan K, Hen R, Nakai J, Yanagawa Y,  
676 Hasuwa H, Okabe M, Deisseroth K, Ikenaka K, Yamanaka A (2012) Expanding the  
677 Repertoire of Optogenetically Targeted Cells with an Enhanced Gene Expression  
678 System. *Cell Rep* 2:397–406.

679  
680 Torda C (1967) Effect of brain serotonin depletion on sleep in rats. *Brain Res* 6:375–  
681 377.

682

683 Tsunematsu T, Tabuchi S, Tanaka KF, Boyden ES, Tominaga M, Yamanaka A (2013)  
684 Long-lasting silencing of orexin/hypocretin neurons using archaerhodopsin induces  
685 slow-wave sleep in mice. *Behav Brain Res* 255:64–74.  
686  
687 Tsutsui-Kimura I, Natsubori A, Mori M, Kobayashi K, Drew MR, de Kerchove  
688 d’Exaerde A, Mimura M, Tanaka KF (2017) Distinct Roles of Ventromedial versus  
689 Ventrolateral Striatal Medium Spiny Neurons in Reward-Oriented Behavior. *Curr Biol*  
690 27:3042-3048.e4.  
691  
692 Urbain N, Creamer K, Debonnel G (2006) Electrophysiological diversity of the dorsal  
693 raphe cells across the sleep-wake cycle of the rat. *J Physiol* 573:679–695.  
694  
695 Wan J, Peng W, Li X, Qian T, Song K, Zeng J, Deng F, Hao S, Feng J, Zhang P, Zhang  
696 Y, Zou J, Pan S, Shin M, Venton BJ, Zhu JJ, Jing M, Xu M, Li Y (2021) A genetically  
697 encoded sensor for measuring serotonin dynamics. *Nat Neurosci* 24:746–752.  
698  
699 Weitzman ED, Rapport MM, Mcgregor P, Jacoby J (1968) Sleep Patterns of the  
700 Monkey and Brain Serotonin Concentration □: Effect of p- Chlorophenylalanine  
701 American Association for the Advancement of Science Stable . 160:1361–1363.  
702  
703 Whitney MS, Shemery AM, Yaw AM, Donovan LJ, Glass JD, Deneris ES (2016) Adult  
704 brain serotonin deficiency causes hyperactivity, circadian disruption, and elimination of  
705 siestas. *J Neurosci* 36:9828–9842.  
706  
707 Yoshida K, Drew MR, Mimura M, Tanaka KF (2019) Serotonin-mediated inhibition of  
708 ventral hippocampus is required for sustained goal-directed behavior. *Nat Neurosci*

709 22:770–777.

710

711 **Figure titles and captions**

712

713 **Figure 1. Dorsal raphe (DR) 5-HT neurons in mice showed oscillatory population**  
714 **activity during non-rapid eye movement (NREM) sleep.**

715 (a) Schematic illustration of a fiber photometry system for monitoring DR 5-HT neuron  
716 activity. EEG and EMG were recorded simultaneously. PMT: Photomultiplier tube.

717 (b) Genetic construct of *Tph2-tTA::tetO-YC-nano50* double transgenic mice.

718 (c) The compound  $\text{Ca}^{2+}$  signal in the DR was monitored via an optic fiber (asterisk  
719 indicates the tip of the fiber). A fluorescence image shows YC-nano50 expression in the  
720 raphe nucleus. Scale bar, 1 □ mm.

721 (d) Representative examples of acquired data, including a trace of the EEG signal, a  
722 relative EEG power spectrum, a trace of the EMG signal, the sleep-wake states (wake:  
723 green; rapid eye movement [REM]: red; NREM: blue), and population  $\text{Ca}^{2+}$  dynamics  
724 of DR 5-HT neurons. Light blue lines indicate  $\text{NREM}^{\rightarrow\text{Wake}}$  epochs, purple lines indicate  
725  $\text{NREM}^{\rightarrow\text{REM}}$  epochs, and red lines indicate REM epochs. Numbers along the bottom  
726 indicate time.

727 (e) Normalized DR 5-HT neuron activities across the sleep-wake cycle. Averaged DR  
728 5-HT neuron activity during NREM sleep was lower than during the wake stage, but  
729 higher than during REM sleep (one-way ANOVA followed by Tukey-Kramer post hoc  
730 test:  $F(2,12) = 138.4$ , wake vs NREM,  $p = 5.9 \times 10^{-4}$ ; NREM vs REM,  $p = 3.3 \times 10^{-7}$ ;  
731 wake vs REM,  $p = 4.0 \times 10^{-9}$ ).  $*p < 0.05$ .

732 (f and g). Representative population activity dynamics of DR 5-HT neurons during the  
733  $\text{NREM}^{\rightarrow\text{Wake}}$  epoch (f) and the  $\text{NREM}^{\rightarrow\text{REM}}$  epoch (g). The solid and dashed lines show



734  $-0.1$  and  $-0.5$  of normalized activities, respectively. Waves that exceeded  $-0.5$  are  
735 marked by black triangles. Time 0 in (f) corresponds to 365 seconds in (d), and time 0  
736 in (g) corresponds to 775 seconds in (d).

737 (h) Trough level of each wave gradually decreased over time during wake ( $F(9, 54) =$   
738  $3.5, p = 1.6 \times 10^{-3}$ ) and NREM ( $F(9, 54) = 43, p = 1.5 \times 10^{-21}$ , repeated measures  
739 ANOVA), but not during the REM ( $F(9, 54) = 0.68, p = 0.72$ ). Shaded area indicates  
740 SEM.  $*p < 0.05$ .

741 (i) Durations of the  $\text{NREM}^{\rightarrow\text{Wake}}$  epoch ( $n = 29$  epochs from 5 animals) and the  $\text{NREM}^{\rightarrow}$   
742  $\text{REM}$  epoch ( $n = 38$  epochs from 5 animals) were comparable ( $p = 0.55, df = 65, t = 0.71$ ,  
743 independent  $t$  test). Error bars indicate SEM.

744 (j) Numbers of concave waves during  $\text{NREM}^{\rightarrow\text{Wake}}$  and  $\text{NREM}^{\rightarrow\text{REM}}$  were comparable  
745 ( $p = 1.0, df = 65, t = 0$ , independent  $t$  test). Error bars indicate SEM.

746 (k) The trough of the last concave wave during  $\text{NREM}^{\rightarrow\text{REM}}$  was lower than that during  
747  $\text{NREM}^{\rightarrow\text{Wake}}$  ( $p = 0.01, df = 65, t = 2.6$ , independent  $t$  test). Error bars indicate SEM.  $*p$   
748  $< 0.05$ .

749 (l) Durations of the last concave wave in  $\text{NREM}^{\rightarrow\text{REM}}$  and  $\text{NREM}^{\rightarrow\text{Wake}}$  were  
750 comparable ( $p = 0.2, df = 65, t = -1.2$ , independent  $t$  test). Error bars indicate SEM.  
751

752 **Figure 2. The increase in wideband EEG power repeatedly coincided with a**  
753 **decrease in dorsal raphe (DR) 5-HT neuron activity during non-rapid eye**  
754 **movement (NREM) sleep.**

755 (a) Temporal changes in the EEG power and the DR 5-HT neural activity. (top panel)  
756 The spectrum of relative EEG power. Periodic yellow-green stripes were observed.  
757 (second panel) Normalization of EEG power for every 1 Hz between 10-50 Hz. (third  
758 panel) The EEG power change. (bottom panel) DR 5-HT neural activity. Red shade  
759 indicates when 5-HT activity was below  $-0.1$  and gray shade indicates when 5-HT  
760 activity was over  $-0.1$ ; it is clear that low 5-HT neural activities coincided with a  
761 wideband EEG power increase and vice versa. In (a), 0 s corresponds to 775 s in Fig. 1d.  
762 Black arrowheads indicate the transition from gray to red shade. Red arrowheads  
763 indicate the trough in red shade.

764 (b) (left panel) EEG data extraction ranges: the last 4 s of the basal 5-HT activity period  
765 (white box) and the 4 s before the trough of 5-HT activity (red box). (middle panel)  
766 individual data from the left panel. Red and black lines indicate powers in the white and  
767 red boxes, respectively. (right panel) population data ( $n = 5$  mice, 7 sessions. Paired  $t$   
768 test with a Bonferroni correction for every 1 Hz; black bar indicates  $*p < 0.01$ ). The  
769 shaded area indicates SEM.

770 (c) Cross-correlation between EEG power (10-50 Hz) and 5-HT activity during an  
771 NREM state. (top panel) Data from panel a. (bottom) Population data ( $n = 5$ ). The  
772 shaded area indicates SEM.

773

774 **Figure 3. Activation of the dorsal raphe (DR) 5-HT neurons induced an EMG**  
775 **amplitude increase and wakefulness.**  
776  
777 (a) Temporal changes in population DR 5-HT neural activity (top) and EMG power  
778 during non-rapid eye movement (NREM) sleep (bottom). Vertical dotted lines indicate  
779 the peak timepoints when the declined DR 5-HT neuron activities returned to baseline.  
780 In panel a, 0 s corresponds to 2105 s in Fig. 1d.  
781 (b) Cross-correlation between DR 5-HT neural activity and EMG power during NREM  
782 sleep. The peak of EMG power followed the rise in DR 5-HT neuron activity with a  
783 0.6-s delay.  
784 (c) Schematic illustration of optogenetic activation of DR 5-HT neurons in a Tph2-  
785 ChR2(C128S) mouse. Scale bar, 1 □ mm. Blue and yellow indicates illumination times.  
786 (d and e) EEG, EEG power spectrum, EMG, before and after optogenetic activation  
787 during NREM sleep (d) and rapid eye movement (REM) sleep (e), respectively. The  
788 vertical yellow lines indicate the timings for illumination.  
789 (f) Mean EMG power for the 10 s before, during, and after optogenetic activation. An  
790 EMG power increase was triggered by optogenetic activation and sustained afterwards  
791 (NREM:  $F(1, 2) = 20$ ,  $p = 4.6 \times 10^{-2}$ , REM:  $F(1, 2) = 26$ ,  $p = 3.6 \times 10^{-2}$ ; repeated measures  
792 ANOVA). DR 5-HT optogenetic activation during a wake period did not alter EMG  
793 power ( $p = 0.22$ ,  $df = 14$ ,  $t = -1.3$ , paired  $t$  test). Yellow light illumination did not alter  
794 EMG power (NREM:  $p = 0.09$ ,  $df = 32$ ,  $t = -1.8$ , REM:  $p = 0.61$ ,  $df = 5$ ,  $t = -0.5$ ; paired  
795  $t$  test).  $*p < 0.05$ . Error bar shows SEM.  
796 (g) Mean EEG delta power for the 10 s before, during, and after optogenetic activation  
797 with cyan light during NREM. The significant delta power decline was induced and

798 sustained ( $F(1, 2) = 129$ ,  $p = 7.6 \times 10^{-3}$ , repeated measures ANOVA). Yellow light

799 illumination did not alter EEG delta power ( $p = 0.18$ ,  $df = 35$ ,  $t = 1.4$ , paired  $t$  test).

800

801

802 **Figure 4. Inhibition of dorsal raphe (DR) 5-HT neuron activity increased the**  
803 **probability of rapid eye movement (REM) transition or sustained non-rapid eye**  
804 **movement (NREM).**

805 (a) Schematic illustration of optogenetic inhibition of DR 5-HT neurons in Tph2-ArchT  
806 mice. Scale bar, 1 □ mm. Yellow shade indicates light illumination.

807 (b) Latency from the start time of the last concave wave of an NREM<sup>→REM</sup> epoch to the  
808 time at the trough of the REM state that follows (gray).

809 (c) Quantification of panel b (n = 32 transitions from NREM to REM). Data show mean  
810 ± SD.

811 (d, f) Time courses of representative EEG, EEG power spectrum, normalized EEG  
812 power, ratio of theta power to delta power of EEG, and EMG with optogenetic  
813 inhibition (yellow), respectively from top to bottom. d) REM-induced trial, f) NREM-  
814 sustained trial.

815 (e) Percentage of REM sleep-induced trials in Tph2-ArchT (7 mice, 81 sessions) and  
816 control mice (4 mice, 40 sessions).

817 (g) Optogenetic inhibition induced a wideband EEG power increase (10-50 Hz:  $p = 0.03$ ,  
818  $df = 13$ ,  $t = -2.5$ , paired t-test,  $*p < 0.05$ ) and did not change in wild type mice (10-50  
819 Hz:  $p = 0.99$ ,  $df = 4$ ,  $t = -5.0 \times 10^{-3}$ , paired t-test,  $*p < 0.05$ ) in NREM sleep-sustained  
820 trials. Data show mean ± SD.

821

822 **Figure 5. The human brain showed transient increases in EEG power during non-**  
823 **rapid eye movement (NREM).**

824 (a) Schematic diagram of polysomnographic recordings.

825 (b) Representative EEG signal, EEG spectrogram, EMG signal, and hypnogram.

826 (c) Z-scored EEG spectrograms in NREM stages 1-3 of a human subject. Black arrow  
827 heads in N2 show typical examples of transient increases in EEG power. White arrows  
828 in N1 show an EMG artifact.

829 (d) Cross-correlation matrices of EEG signals at each frequency band and 5-HT activity  
830 during NREM sleep. In mice (leftmost panel), EEG signals at  $\alpha$  vs  $\beta$  and  $\alpha$  vs  $\theta$  bands  
831 had moderate to strong positive cross-correlations. In humans, EEG signals at the same  
832 bands, namely  $\alpha$  vs  $\beta$  and  $\alpha$  vs  $\theta$ , during all stages of NREM sleep showed weak to  
833 moderate positive cross-correlations. These results demonstrate that in both mice and  
834 humans there were higher cross-correlations among EEG signals in  $\alpha$ ,  $\beta$ , and  $\theta$   
835 frequencies, although the strongest correlation in human EEG was observed between  $\delta$   
836 vs  $\theta$  bands. Note that the significant negative cross-correlations between 5-HT activity  
837 and EEG signal at  $\alpha$  and  $\beta$  bands in mice may suggest that similar 5-HT dynamics occur  
838 in the human EEG.

839

840 **Figure 3-1. Light illumination of control mice did not change EMG power, related**  
841 **to Figure 3.**

842 (a) Duration of a wake period in Tph2-YC mice (left; n = 3, 1-2 sessions per mouse, 112  
843 periods) and duration of the induced wake-like period after light illumination in Tph2-  
844 Chr2 mice (right; n = 3, 3 sessions per mouse, 42 periods). In the box plots, the central  
845 mark indicates the median, and the bottom and top edges of the box indicate the 25th  
846 and 75th percentiles, respectively. Whiskers denote the range.

847 (b) Representative figures of the EEG, relative EEG power, EMG, and relative EMG  
848 power. Images represent data from Tph2-ChR2 mice that received cyan light  
849 illumination (optogenetic activation) during the wake period. Blue shade indicates 1 s of  
850 blue illumination and yellow shade indicates 5 s of yellow illumination.

851 (c) Mean EMG power as measured 1 s before and after cyan light illumination (three  
852 left panels) or 1 s before and after yellow light illumination (two right panels) in control  
853 mice (n = 3, 3 sessions per mice). EMG power during the wake period (left side, left  
854 panel; total 13 illumination), during the non-rapid eye movement (NREM) period (left  
855 side, middle panel; total 22 illumination), and during the rapid eye movement (REM)  
856 period (left side, right panel; total 17 illumination), as well as EMG power following  
857 yellow light illumination as a control during NREM period (right side, left panel; total  
858 24 illumination) and during the REM period (right side, left panel; total 13 illumination).  
859 There were no significant differences between pre and during illumination (cyan light:  
860 wake,  $p = 0.67$ ,  $df = 12$ ,  $t = -0.4$ ; NREM,  $p = 0.89$ ,  $df = 21$ ,  $t = 0.15$ ; REM,  $p = 0.41$ ,  $df$   
861  $= 16$ ,  $t = 0.85$ ; yellow light: NREM,  $p = 0.06$ ,  $df = 23$ ,  $t = 2.0$ ; REM,  $p = 0.21$ ,  $df = 12$ ,  $t$   
862  $= 1.3$ ; paired  $t$  test).

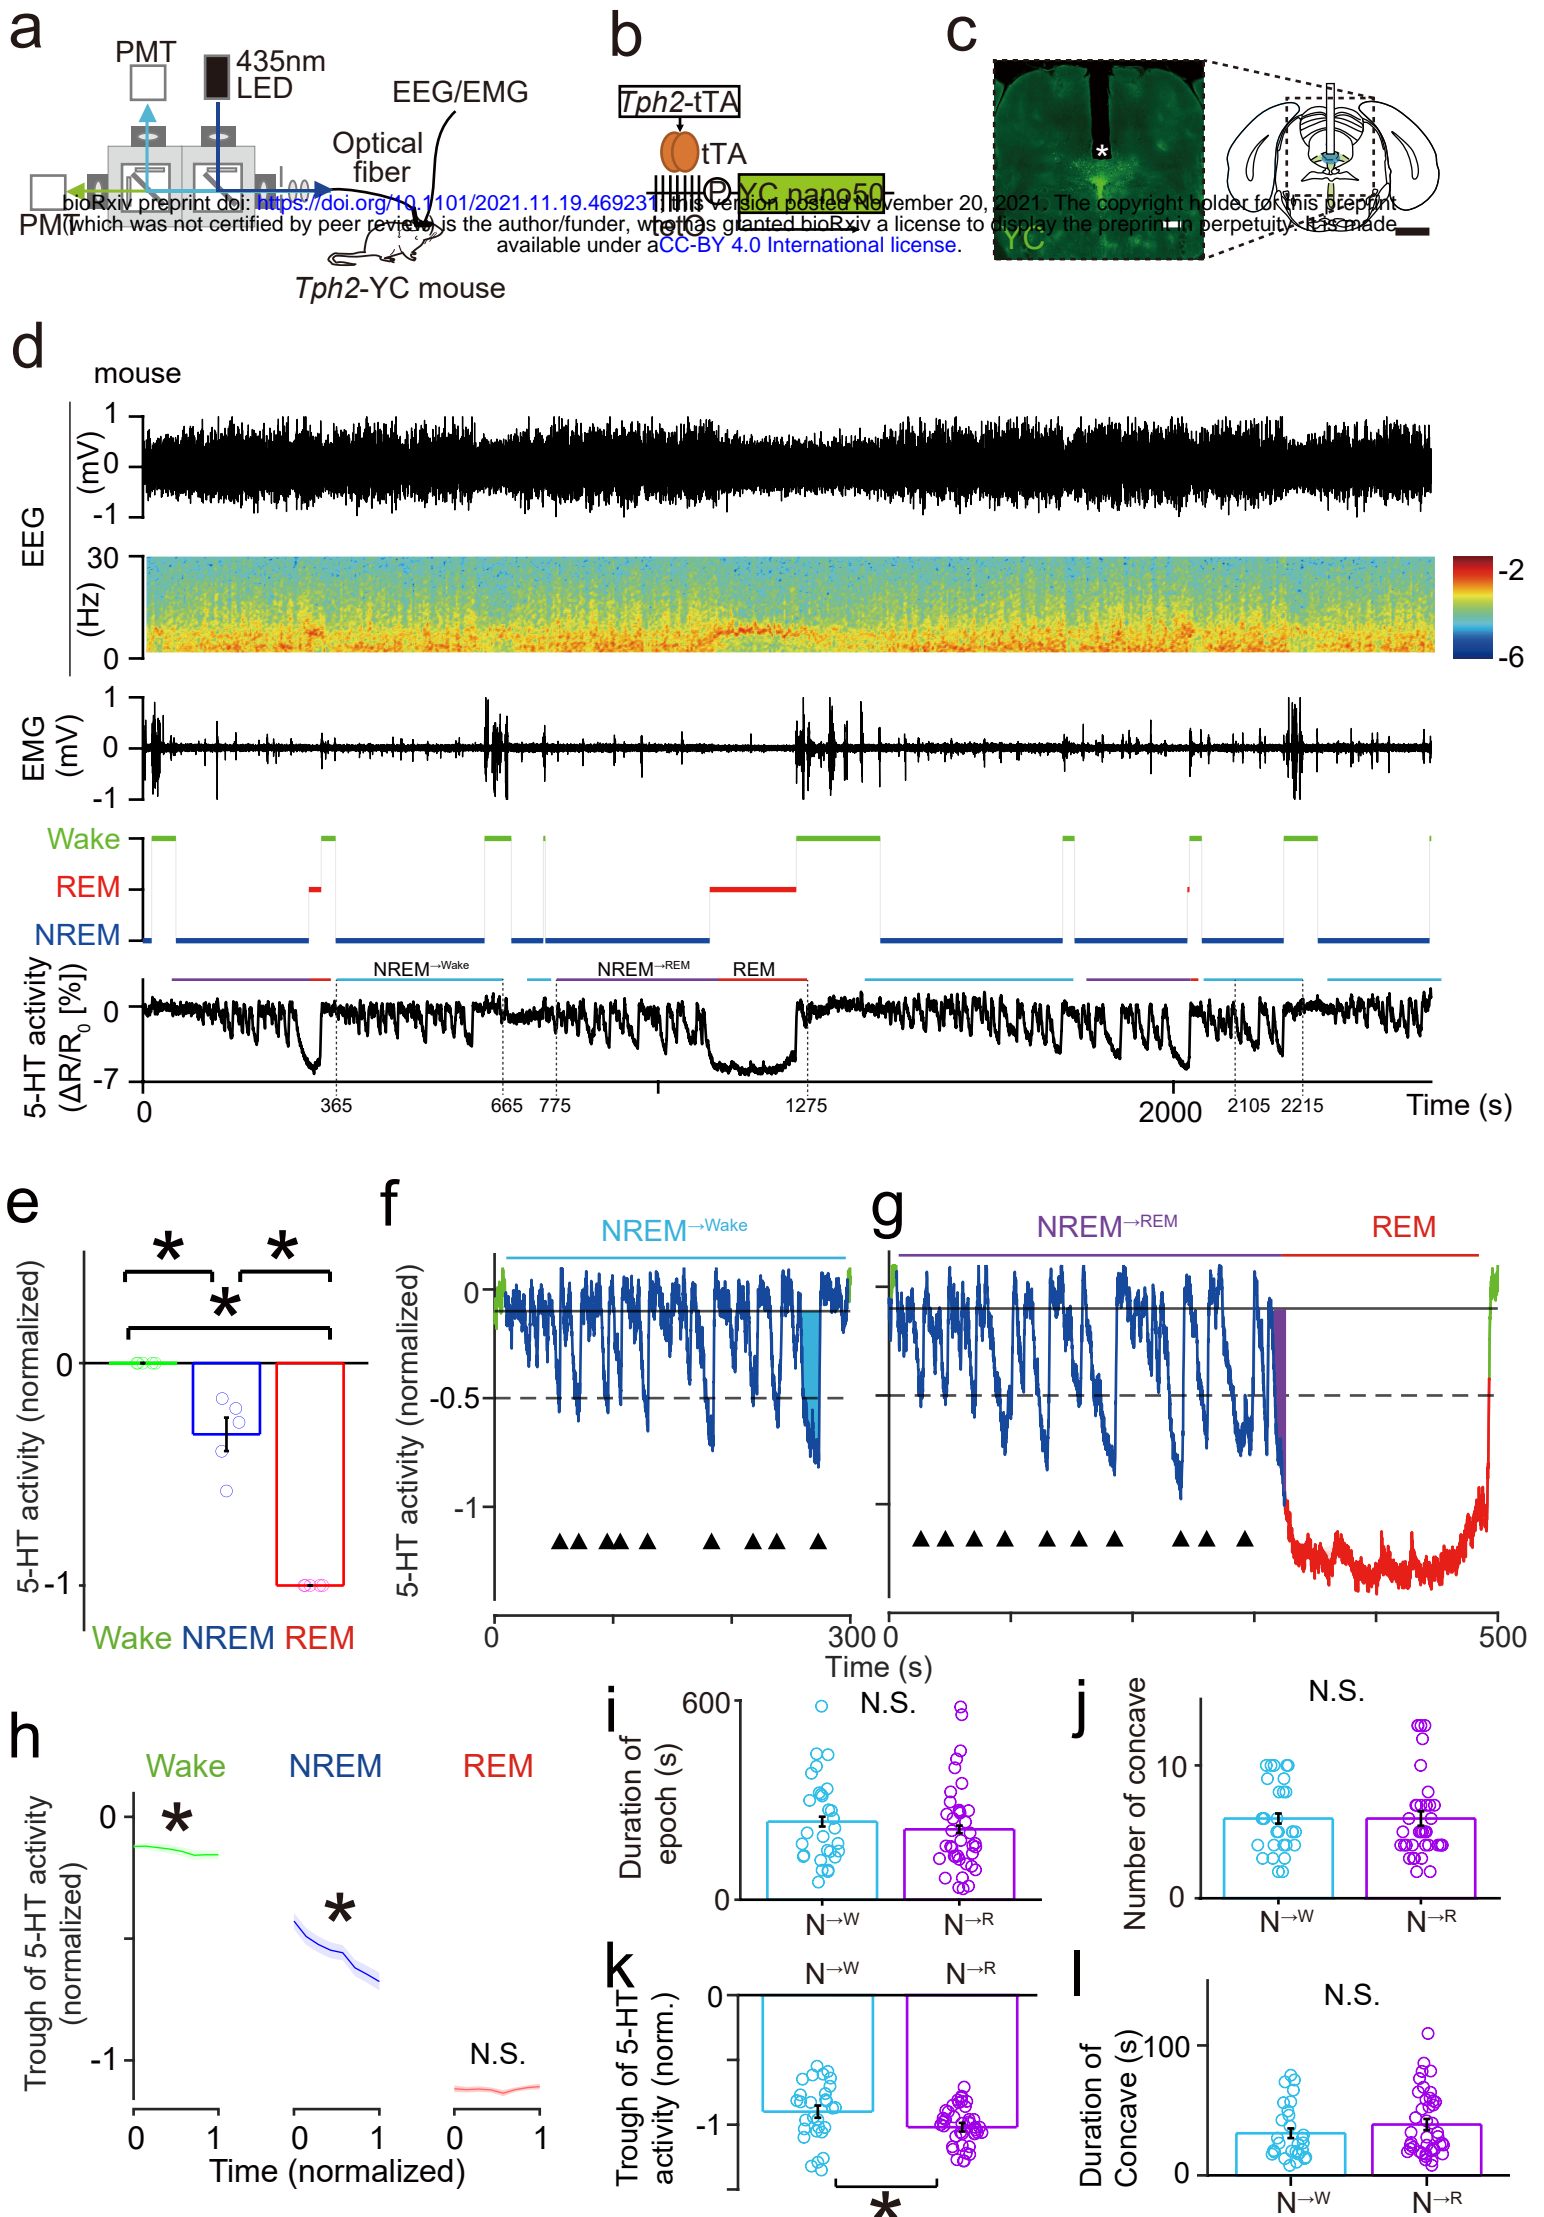



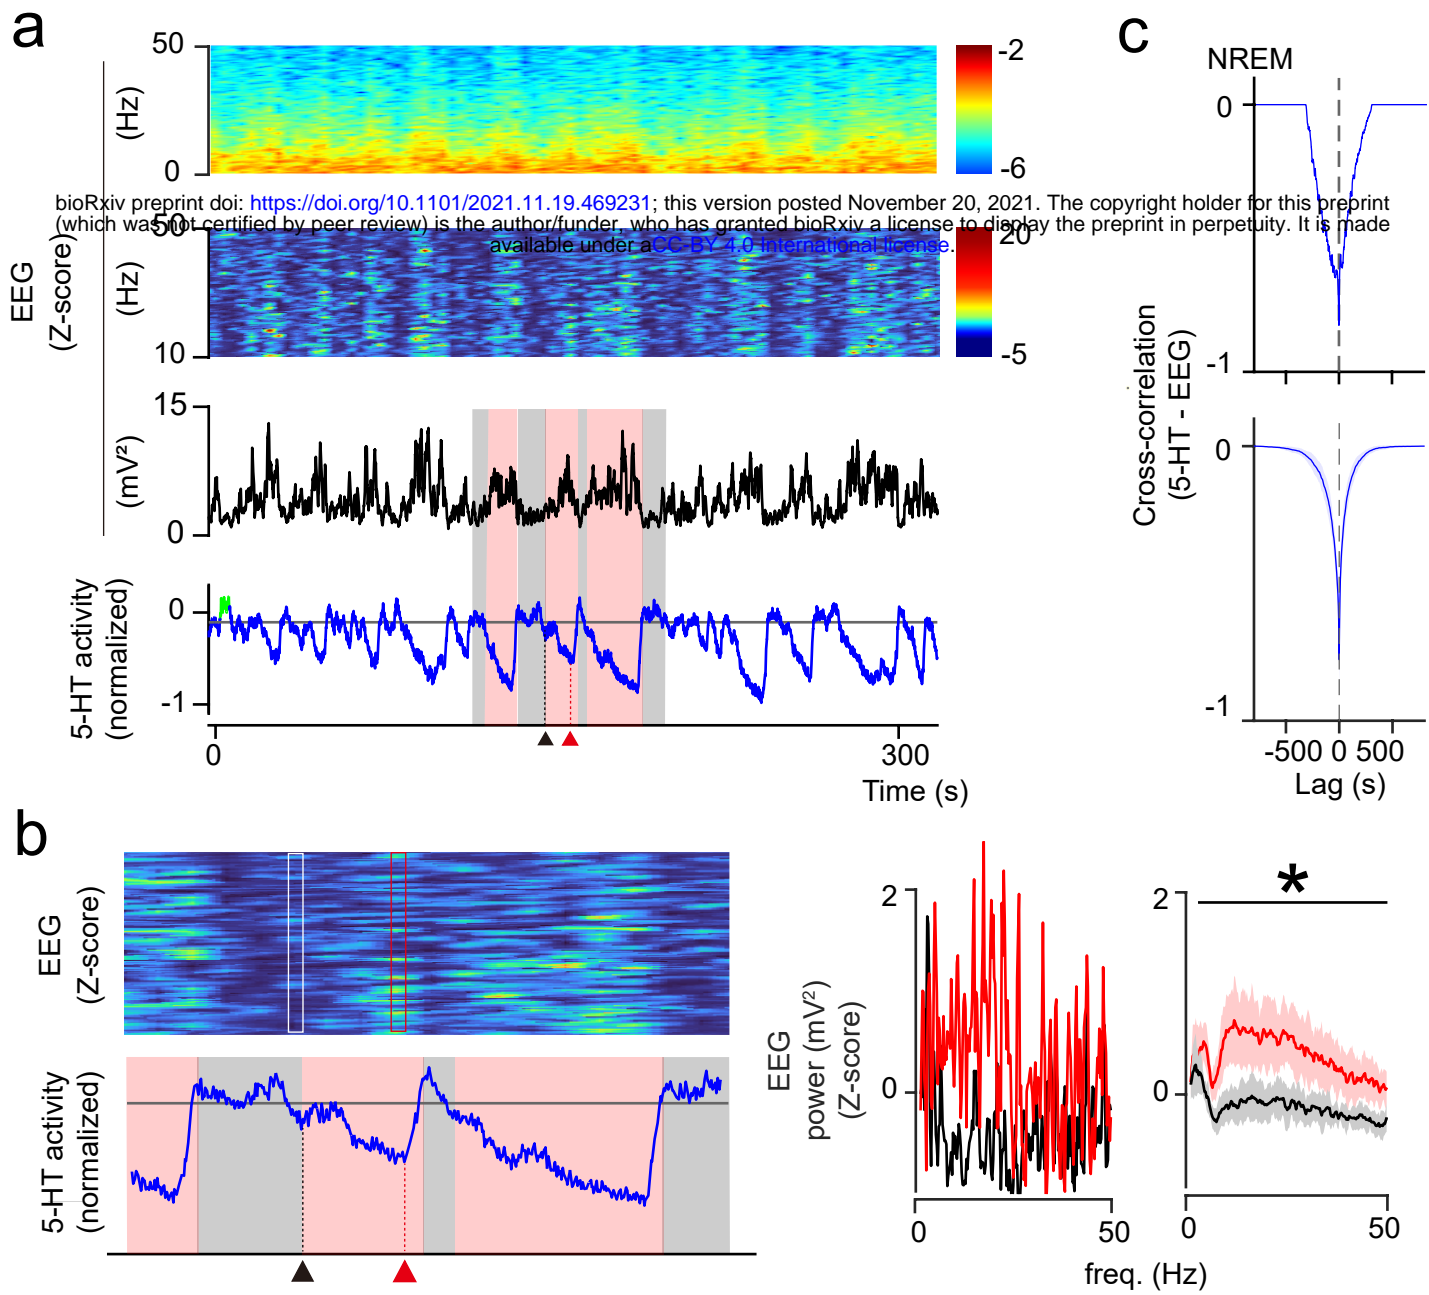

Fig 2 Kato

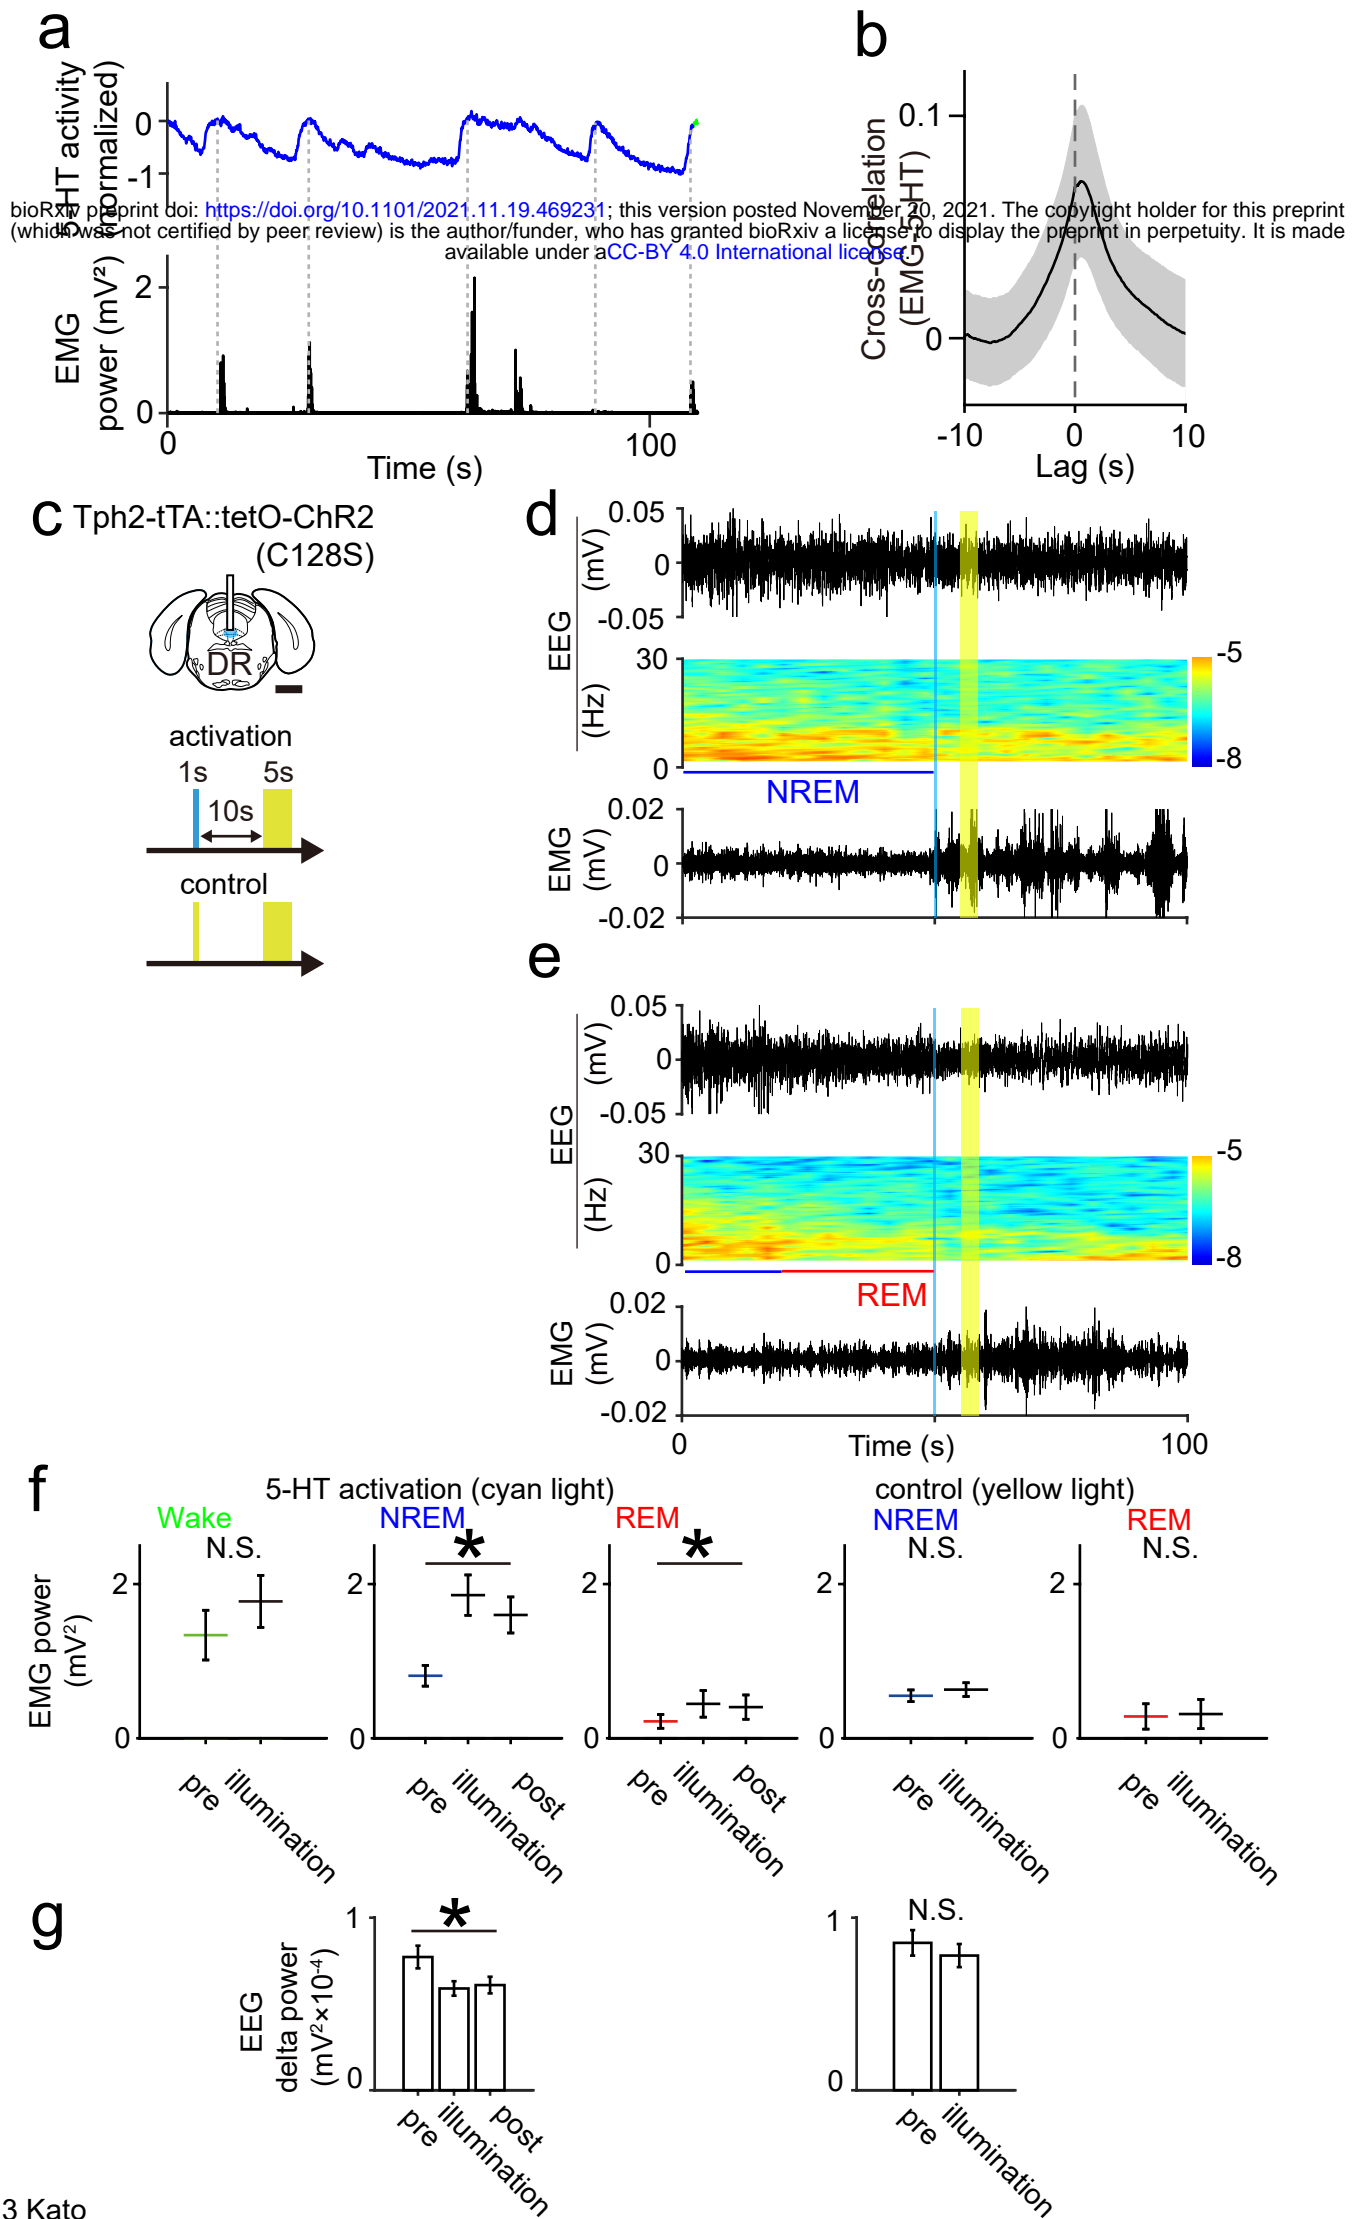

Fig 3 Kato

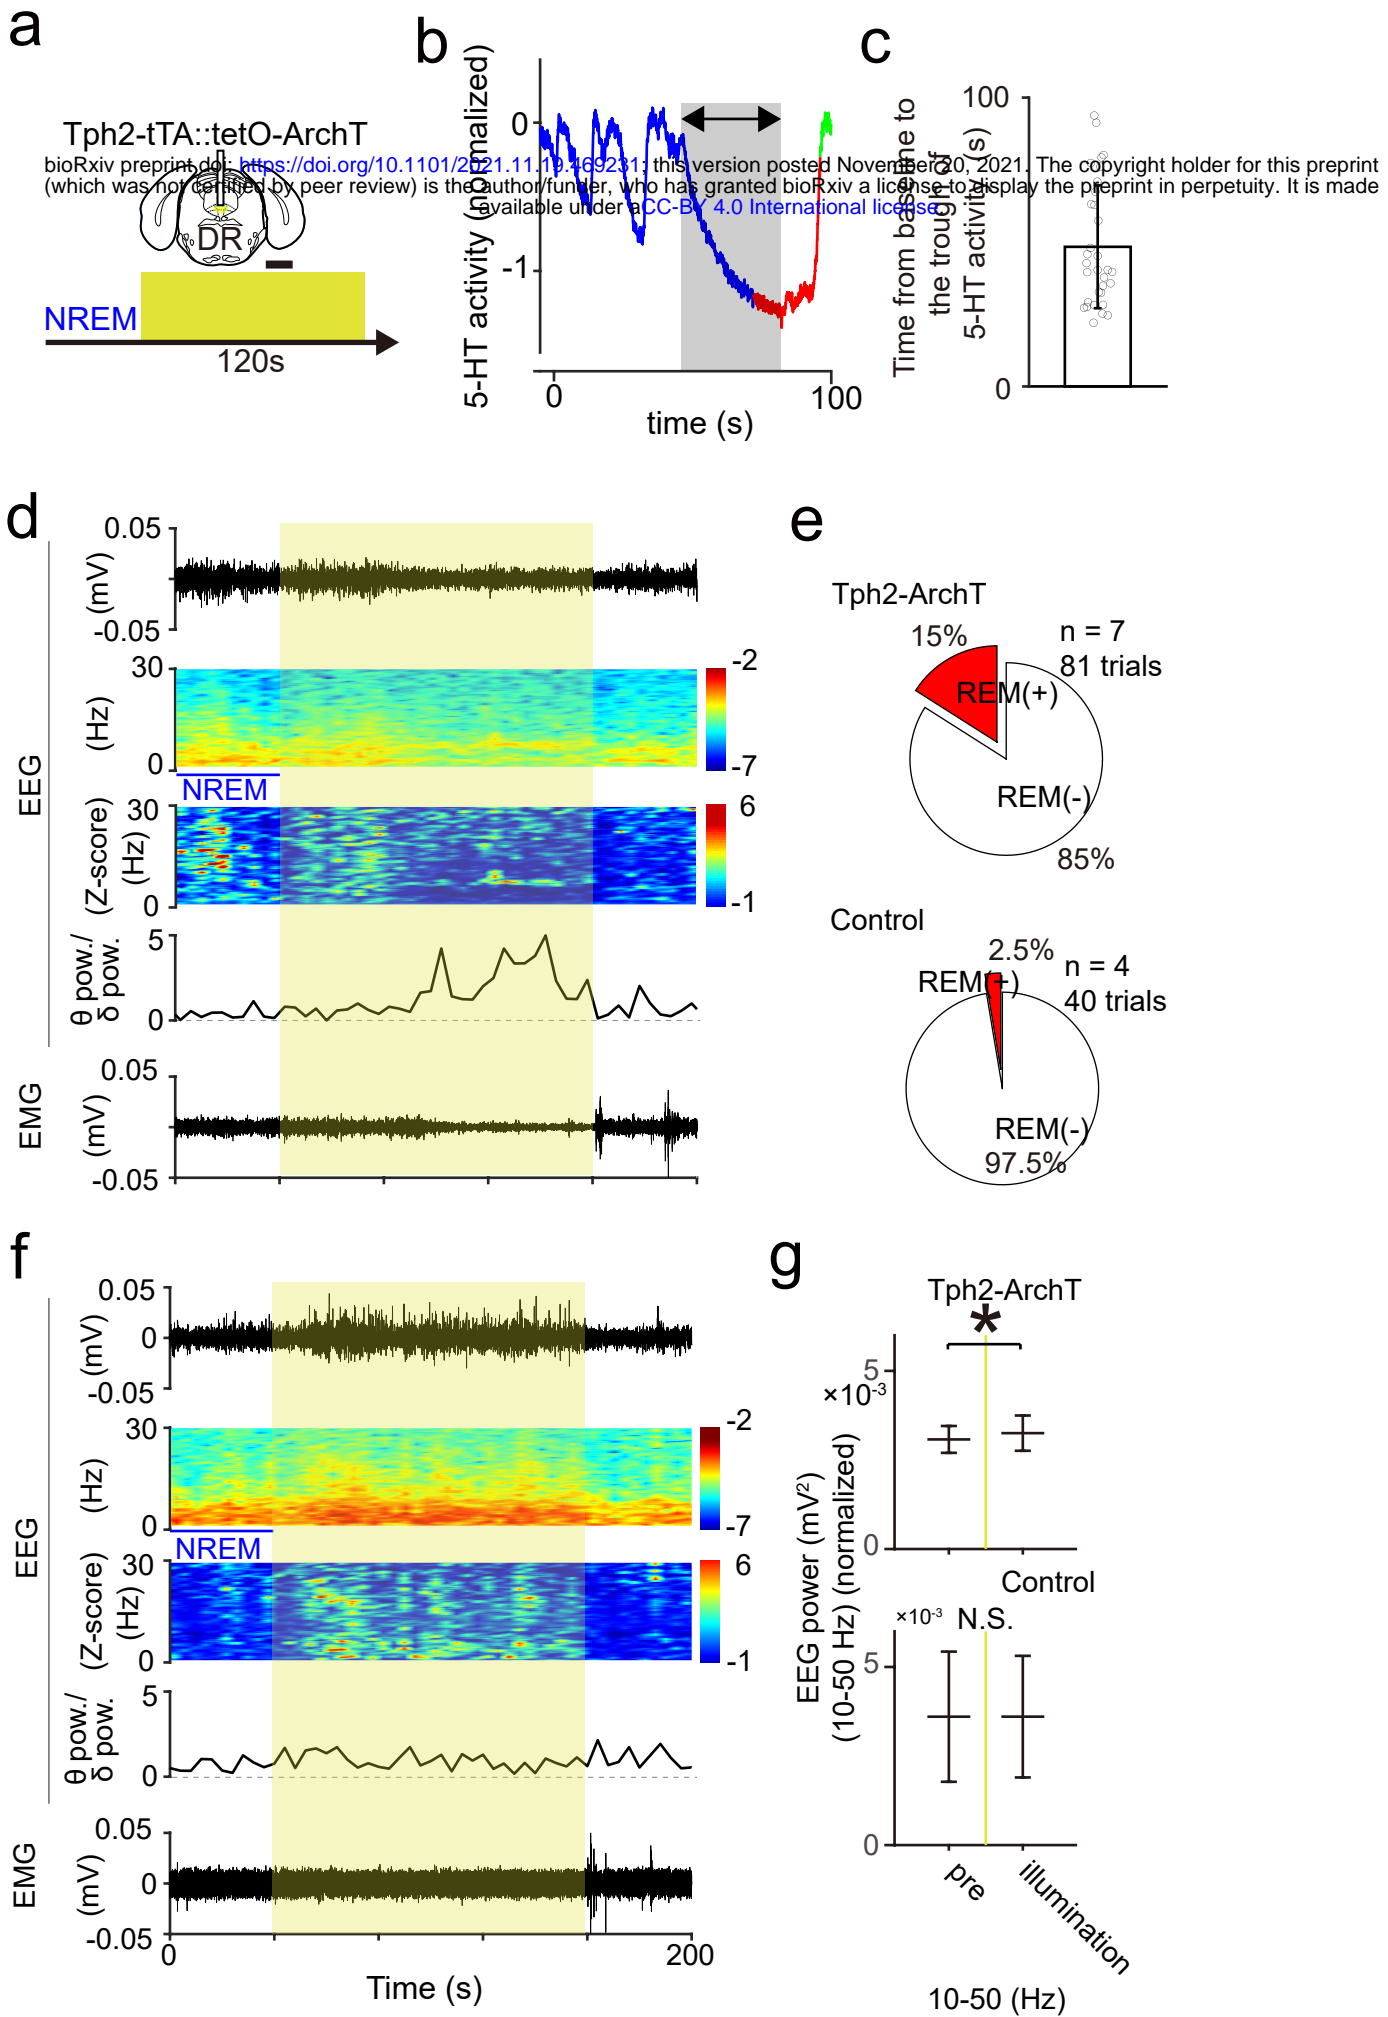

Fig 4 Kato

**a**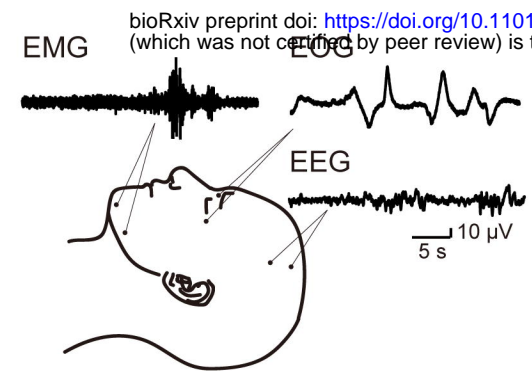**b**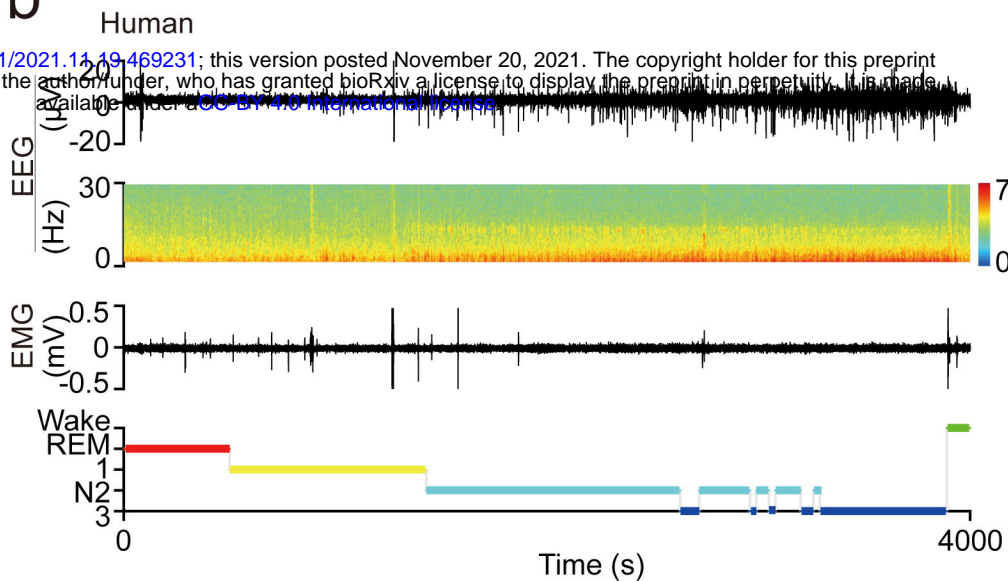**c**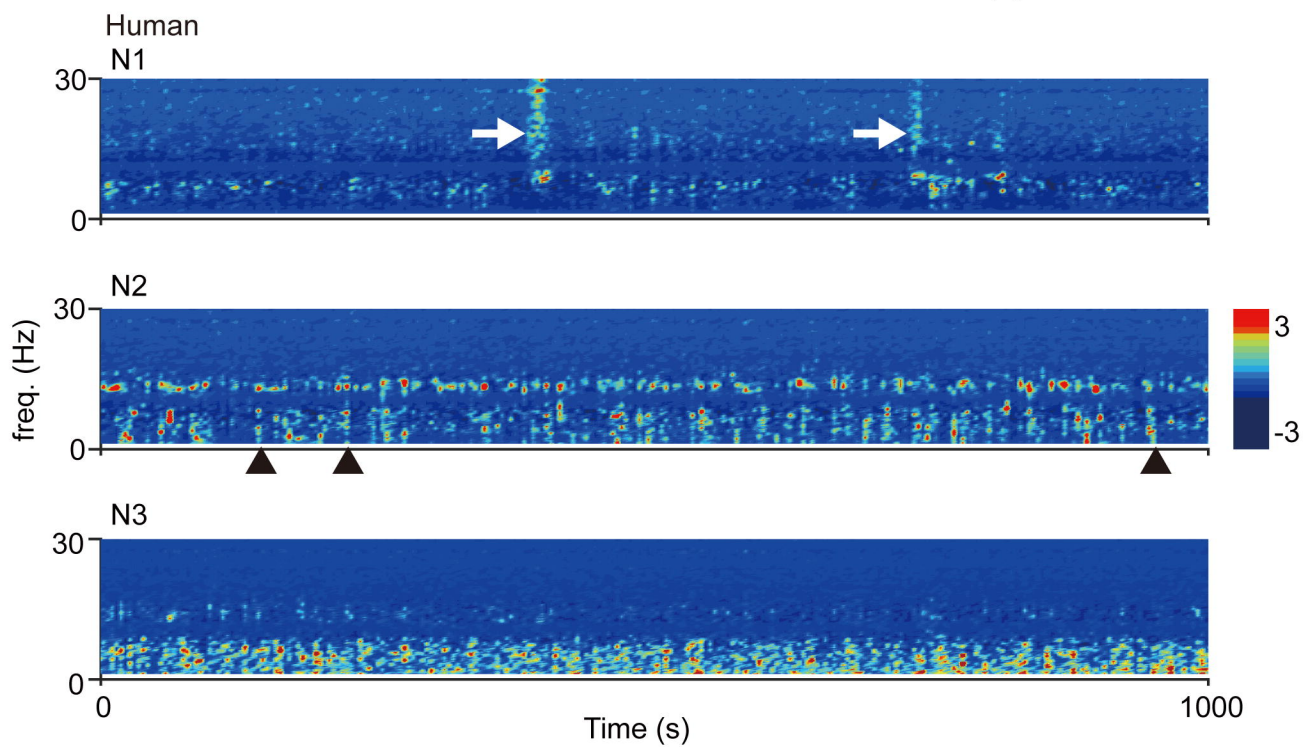**d**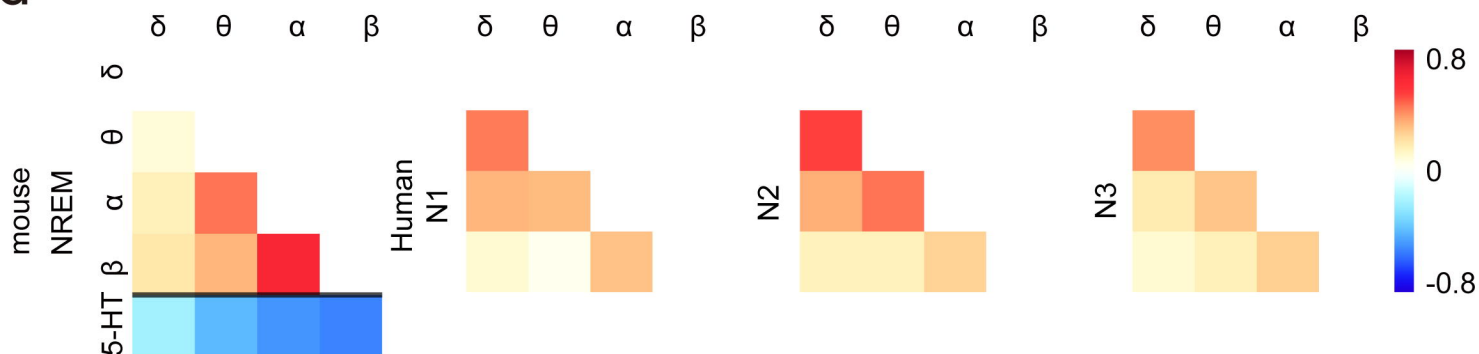

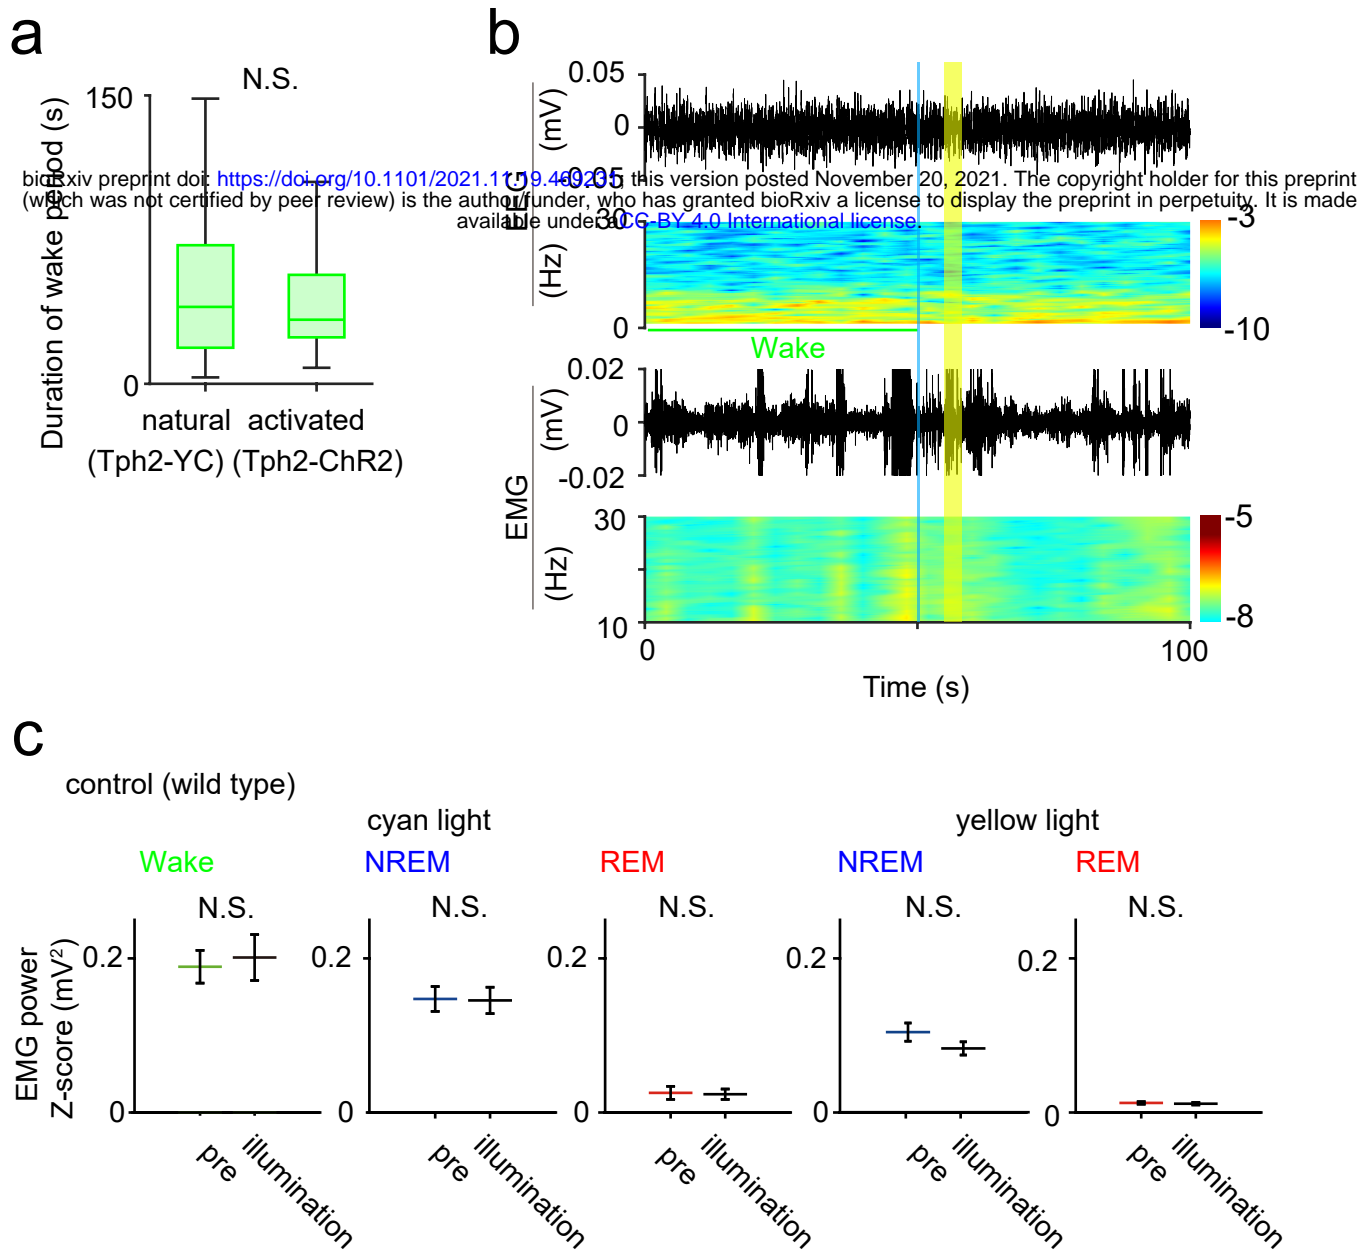

Fig 3-1 Kato
